# Supplementary material for: Mapping Quantitative Trait Loci for High-Temperature Adult-Plant Resistance to Stripe Rust in Spring Wheat PI 197734 Using a Doubled Haploid Population and Genotyping by Multiplexed Sequencing
Source: Front Plant Sci. 2020 Nov 12;11:596962. doi: 10.3389/fpls.2020.596962 (PMC7688900; doi:10.3389/fpls.2020.596962)
Supplement: Supplementary file 5 [file Table_3.XLSX]

## Sheet: Sheet1
Supplementary Table S3 Genotypes of marker loci within the 1A and 3B resistance QTL regions in 95 spring wheat cultivars and rust reactions of these cultivars in different environments
		1A			3B				Stripe rust reactions
No.	Cultivar	IWA2015	IWB8918	IWA5405	IWB34349	IWB2841	IWB41148	IWA6297	PU17-ITd	PU17-DS	MV17-ITe	MV17-DS	PU18-ITf	PU18-DS	MV18-ITg	MV18-DS
SPa	AvS	T	G	T	C	A	T	T	8	95	8	100	8	98.3	8	100
RPb	PI 197734	C	A	C	T	C	C	C	1.3	1.3	2.3	6.7	1.3	1.3	2.7	5.7
1	12-SW-068	C	.c	T	T	C	C	C	3	20	3	30	2	30	3	20
2	14-SW-1030	C	G	T	T	C	C	C	2	5	2	2	2	2	0	0
3	14-SW-1059	C	G	.	T	C	C	T	3	2	1	1	2	2	0	0
4	SY 04PN3024-2	C	G	C	T	A	T	T/C	3	30	3	20	3	30	3	10
5	UI-Stone	C	G	C	T	A	T	T/C	3	20	4	50	5	70	4	20
6	WB-1035CL+	T	A	T	C	A	T	C	5	50	8	90	7	95	8	80
7	SY Steelhead	T	G	T	C	A	T	T	3	5	3	10	3	30	3	10
8	WA 8265 CL+	C	G	C	T	C	C	C	4	40	7	70	6	95	7	90
9	WA 8266 CL+	C	G	C	T	C	C	C	4	30	6	70	7	90	6	70
10	Seahawk	C	A	T	T	A	T	C	0	0	1	1	0	0	0	0
11	Tekoa (WA 8189)	C	G	C	C	A	T	C	3	20	1	1	2	10	2	5
12	Ryan (WA 8214)	C	G	C	T	C	C	C	3	10	2	5	3	20	4	20
13	WA 8236 CL+	C	A	T	T	C	C	T	1	1	1	1	2	5	3	5
14	WA 8255	C	G	T	T	A	T	C	4	40	2	20	3	30	3	10
15	YS-602	C	A	T	C	A	T	T	4	30	2	5	3	20	3	5
16	12-SW-052	C	G	C	T	C	C	T/C	3	20	1	1	2	20	2	5
17	10SB0087-B	C	A	C	T	C	T	C	3	10	1	1	2	5	1	1
18	12SB0197	C	A	C	T	C	T	C	3	5	1	1	2	5	0	0
19	12SB0199	C	G	C	T	C	T	C	2	2	1	1	2	5	0	0
20	12SB0224	C	A	C	C	A	T	T	1	1	1	1	1	1	0	0
21	LCS Iron (11SB0096)	C	A	.	T	C	T	C	0	0	1	1	1	1	0	0
22	LCS Buck Pronto	C	A	C	C	A	T	T	3	30	5	70	5	80	5	60
23	Bullseye	C	A	C	C	A	T	T	3	30	3	10	5	70	4	20
24	HRS 3504	C	A	C	T	C	C	T	6	40	8	90	8	100	8	100
25	HRS 3530	T	A	C	C	A	T	T	5	40	8	90	8	100	8	90
26	HRS 3616	T	G	T	T	C	C	C	3	30	5	80	8	100	4	20
27	WA 8240 CL+	C	G	C	T	C	C	C	2	1	1	1	1	1	1	1
28	WA 8241 CL+	C	A	C	C	A	T	T	3	10	2	5	3	20	3	10
29	WA 8259	C	A	C	T	C	T	T	4	20	2	20	3	50	3	20
30	SY Coho (04W40292R)	C	A	C	C	A	T	T	3	10	2	2	4	15	2	2
31	WA 8261	C	A	C	C	A	T	T	3	20	2	10	2	20	3	5
32	YS-802-1	C	A	T	C	C	C	C	6	30	7	70	8	100	8	70
33	SY Basalt	C	A	C	T	C	T	C	0	0	1	1	1	1	0	0
34	WA 8263	T	G	C	T	C	C	C	1	1	2	10	3	5	0	0
35	WA 8264	C	A	C	T	C	.	C	3	5	2	10	3	5	3	2
36	BIG CLUB	T	A	C	C	.	T	T	8	95	8	100	8	100	8	40
37	FEDERATION	T	A	C	T	C	T	C	2	2	4	40	3	30	3	10
38	RED BOBS	C	A	C	T	C	C	T/C	1	1	3	70	6	80	3	30
39	MARFED	C	A	C	C	A	T	T	3	10	3	30	7	90	4	40
40	REDMAN	C	A	C	C	A	T	T	3	10	5	80	6	80	5	70
41	LERMA ROJO	C	A	C	T	C	.	C	3	10	6	90	7	90	5	70
42	PITIC 62	C	A	C	C	A	T	T	3	10	6	80	6	80	5	60
43	TOBARI 66	T	.	C	C	A	T	T	5	30	8	100	8	100	8	90
44	WADUAL 94	C	A	C	T	C	C	T/C	3	10	2	10	4	40	3	10
45	NORCO	T	G	T	T	C	C	C	4	20	8	10	7	90	5	5
46	TWIN	C	G	C	T	C	C	C	3	30	4	40	5	50	3	20
47	SPRINGFIELD	C	G	C	T	C	C	C	3	40	5	80	7	100	5	60
48	WANDELL	C	A	C	T	A	T	T	3	5	2	5	3	20	3	5
49	ANZA	T	G	T	C	A	T	T	3	40	2	10	5	80	4	30
50	PEAK 72	C	A	C	T	C	T	C	2	5	2	20	3	50	3	20
51	WARED	T	G	.	T	A/C	.	T	3	20	3	20	6	80	7	60
52	BORAH	T	G	.	C	A	T	T	3	20	4	60	5	80	3	30
53	URQUIE	C	G	C	T	C	.	T	3	5	4	60	3	30	3	20
54	YECORA ROJO	C	A	C	T	C	T	C	3	30	5	90	5	80	6	70
55	PROTOLA	C	A	C	C	A	T	T	3	20	4	60	5	60	4	30
56	TANORI 71	T	G	C	T	C	C	T	4	30	6	80	5	30	6	70
57	IRRIDUR	C	A	C	C	A	T	T	2	1	1	1	1	1	2	2
58	SAWTELL	C	A	C	T	C	T	T	3	10	8	80	6	80	6	50
59	FIELDWIN	.	A	T	C	A	T	T	5	30	8	60	6	70	8	30
60	CANDO	C	A	C	T	A	T	T	3	5	4	30	2	10	3	5
61	MODOC	C	A	C	C	A	T	T	3	2	1	1	2	2	0	0
62	SHASTA	T	G	C	C	A	T	T	7	70	3	20	3	30	5	40
63	WAMPUM	C	A	C	T	C	C	T	2	5	3	30	3	30	3	20
64	DIRKWIN	C	G	T	T	C	C	T/C	6	50	3	30	4	30	3	10
65	WALLADAY	T	G	.	T	C	C	C	5	50	8	70	7	70	5	20
66	STERLING	C	A	C	T	C	C	T/C	6	50	2	10	2	10	3	5
67	MCKAY	T	G	T	C	A	T	T	6	60	3	10	3	40	7	70
68	OWENS	.	A	T	T	C	C	T/C	6	90	7	80	8	95	8	90
69	WAVERLY	C	G	C	T	C	C	T/C	3	10	2	10	4	50	5	70
70	ALPOWA	.	A	C	C	A	T	C	6	90	3	60	3	20	3	10
71	WAWAWAI	C	A	T	T	C	C	C	3	10	4	40	5	70	5	60
72	BLANCA GRANDE	C	A	C	C	C	T	C	2	2	1	1	3	10	1	1
73	WHITEBIRD	C	A	T	T	C	C	C	6	90	8	90	7	90	7	60
74	POMERELLE	C	G	C	T	C	C	C	3	20	3	40	5	70	6	60
75	JEFFERSON	C	A	C	T	C	T	T	3	50	5	60	4	70	5	40
76	BUTTE 86	C	A	C	T	C	C	T/C	4	20	3	30	6	80	6	30
77	PRO BAND 711	T	G	T	C	A	T	T	2	5	3	10	3	10	3	20
78	GERSPHR	C	A	C	C	A	T	T	5	60	8	80	7	95	6	60
79	WINSOM (OR870453)	C	A	C	C	C	C	C	2	2	4	20	3	20	3	5
80	LAURA	T	G	C	T	A	T	C	3	20	3	30	5	60	4	40
81	ORCA	T	G	T	T	C	C	C	1	1	2	5	3	10	1	1
82	OPAL	T	G	T	T	C	C	C	1	1	2	2	2	10	2	5
83	BONUS	C	A	C	T	A	T	T	5	90	4	20	5	80	6	50
84	ID0232	C	G	.	T	C	.	T/C	3	10	7	70	4	60	7	60
85	TREASURE	C	A	T	C	A	T	C	4	80	6	60	4	60	5	60
86	EDWALL	C	A	T	C	A	T	C	4	70	4	50	4	60	3	20
87	BLISS	.	A	T	T	C	C	C	1	1	2	10	3	10	2	2
88	PENAWAWA	.	A	C	T	A	T	C	4	70	3	60	3	40	3	5
89	COPPER	C	.	C	C	A	T	T	3	20	3	40	3	50	4	40
90	SPILLMAN	C	G	T	T	C	C	T/C	3	20	3	20	3	20	3	5
91	WAKANZ	C	G	C	T	C	C	C	3	20	3	30	4	30	2	5
92	WADUAL	C	A	C	T	A	T	T	3	20	3	30	6	90	5	70
93	WA007492	C	G	C	T	C	C	C	2	10	1	1	2	10	2	10
94	Express	C	A	C	C	A	T	T	4	5	4	40	3	20	3	10
95	KRONOS	C	A	T	C	A	T	T	3	20	3	20	5	5	3	5
Polymorphism (%)		22.2	40.2	29.2	36.8	43.6	60	43.2
No. of genotypes with the RP haplotype		36			20
% of genotypes with the RP haplotype		37.9			21.1
a SP = susceptible parent.									d PU17 = Pullman 2017
b RP = resistant parent.									e MV17 = Mount Vernon 2017
c. Denotes missing data									f PU18 = Pullman 2018
									g MV18 = Mount Vernon 2018
