# Supplementary material for: Mapping Quantitative Trait Loci for High-Temperature Adult-Plant Resistance to Stripe Rust in Spring Wheat PI 197734 Using a Doubled Haploid Population and Genotyping by Multiplexed Sequencing
Source: Front Plant Sci. 2020 Nov 12;11:596962. doi: 10.3389/fpls.2020.596962 (PMC7688900; doi:10.3389/fpls.2020.596962)
Supplement: Supplementary file 6 [file Table_4.XLSX]

## Sheet: Sheet1
Data File 1 Genotype data of 178 AvS*PI 197734 DH lines (A: genotype of AvS; B: genotype of PI197734; '*': missing data)
Marker	Position	Chromosome	Chr Label	DH-1	DH-2	DH-3	DH-4	DH-5	DH-6	DH-7	DH-9	DH-10	DH-11	DH-12	DH-14	DH-15	DH-16	DH-17	DH-18	DH-19	DH-20	DH-22	DH-23	DH-24	DH-25	DH-26	DH-27	DH-28	DH-29	DH-30	DH-31	DH-32	DH-34	DH-35	DH-36	DH-37	DH-38	DH-39	DH-40	DH-41	DH-42	DH-43	DH-44	DH-45	DH-46	DH-47	DH-48	DH-49	DH-50
IWA1376	0	1	1A	A	A	B	A	B	B	A	A	A	B	A	B	B	B	A	A	A	B	B	B	A	A	B	A	B	B	A	B	A	B	A	B	A	A	B	B	B	A	B	A	B	B	B	A	B	B
IWB9312	9.45	1	1A	A	B	B	A	B	B	A	A	A	A	A	B	B	B	A	A	A	B	B	B	B	A	B	A	B	B	A	B	A	B	B	B	B	A	B	B	B	A	A	B	B	B	B	A	B	A
IWA414	9.45	1	1A	A	B	B	A	B	B	A	A	A	A	A	B	B	*	*	A	A	B	B	B	B	A	B	A	B	*	A	B	A	*	B	B	*	*	B	B	B	A	A	B	B	B	B	A	B	A
Xbarc148	22	1	1A	A	B	B	A	B	A	A	A	A	B	A	B	B	A	A	A	A	A	B	B	B	A	A	A	B	B	B	B	A	*	B	B	B	A	B	*	B	A	A	B	A	A	B	B	B	A
IWA5169	32.07	1	1A	A	A	B	A	B	A	A	B	A	B	B	B	A	A	A	A	A	A	B	B	B	A	A	B	B	B	B	B	A	*	B	B	B	A	B	*	A	A	B	B	A	A	B	B	B	A
IWA2703	40.52	1	1A	B	A	B	A	B	A	A	B	A	B	B	A	A	A	A	A	A	A	B	B	A	A	A	B	B	B	A	B	A	*	B	B	B	A	B	*	B	A	B	B	A	A	B	B	B	A
IWA4080	48.68	1	1A	B	A	A	A	B	A	A	B	B	B	B	A	A	A	A	A	B	B	B	B	A	A	A	B	B	B	A	B	A	A	B	B	A	A	B	B	B	A	B	B	A	A	B	B	B	A
IWA1790	71.23	1	1A	B	A	A	A	A	B	A	B	B	B	B	A	A	A	B	A	B	B	A	A	A	B	A	A	B	B	A	B	A	A	B	B	A	A	B	B	B	A	B	A	A	A	B	B	B	B
IWA475	71.79	1	1A	B	A	A	A	A	B	A	B	B	B	B	A	A	A	B	A	B	B	A	A	A	B	A	A	B	B	A	B	A	A	B	B	A	A	B	B	B	A	B	A	A	A	B	B	B	B
IWA3145	75.5	1	1A	B	A	A	A	A	B	A	B	*	B	B	A	A	A	B	A	B	B	A	A	A	B	A	A	B	B	A	B	A	A	B	B	A	A	B	B	B	*	B	A	A	A	B	B	B	B
IWA6152	80.31	1	1A	B	A	A	A	A	B	A	B	*	B	A	A	A	A	B	A	B	B	A	A	B	B	A	A	B	B	A	B	A	A	A	B	A	A	B	B	B	*	B	A	B	A	B	B	B	B
IWA2015	86.68	1	1A	B	A	A	*	A	*	*	B	*	*	A	*	A	B	B	*	B	*	A	A	B	A	A	A	B	B	A	B	*	*	A	B	A	*	B	B	*	*	*	A	B	A	B	B	B	B
IWB8918	87.48	1	1A	B	A	A	*	A	*	A	B	B	A	A	B	A	B	B	*	B	*	A	A	B	A	A	A	B	B	A	B	*	B	A	B	A	A	B	B	*	A	B	A	B	A	B	B	B	B
IWA5405	92.22	1	1A	B	A	A	*	A	*	*	A	*	*	A	B	A	B	B	*	B	*	A	A	B	A	A	A	B	B	A	B	*	B	A	B	B	*	B	B	*	*	*	A	B	A	B	B	B	B
IWB6759	92.22	1	1A	B	A	A	*	A	*	*	A	*	*	A	*	A	B	B	*	B	*	*	A	B	*	*	A	B	B	A	B	*	*	A	*	B	*	B	B	*	*	*	A	B	A	B	B	*	*
Xbarc17	93.2	1	1A	B	A	A	A	A	B	A	A	B	A	A	B	A	B	B	A	B	B	A	A	B	A	A	A	B	B	A	B	*	B	A	B	B	B	B	B	A	A	B	A	B	A	B	B	B	B
Xbarc158	93.79	1	1A	B	A	A	A	A	B	A	A	B	A	A	B	A	B	B	A	B	B	A	A	B	A	A	A	B	B	A	B	*	B	A	B	B	B	B	B	A	A	B	A	B	A	B	B	B	B
IWB51198	0	2	1B	A	A	A	A	B	A	A	A	B	*	A	A	B	A	B	A	A	B	A	B	B	A	B	B	A	A	B	A	A	A	B	*	B	B	B	B	A	A	B	A	B	A	A	B	B	A
IWB1270	0.63	2	1B	A	A	A	A	B	A	A	A	B	B	A	A	B	A	B	A	A	B	A	B	B	A	B	B	A	A	B	A	A	A	B	A	B	B	B	B	A	A	B	A	B	A	A	B	B	A
IWA3295	3.86	2	1B	A	A	A	A	B	A	A	A	B	B	A	A	B	*	B	A	A	*	A	B	B	A	B	B	A	A	B	A	A	A	B	A	A	B	B	B	A	A	A	A	*	A	A	B	B	A
IWA6063	7.74	2	1B	A	A	A	A	B	*	A	A	B	B	A	A	B	*	B	A	A	B	B	*	*	A	B	B	A	A	*	A	A	A	*	A	A	B	B	B	A	A	A	A	B	A	A	B	*	A
IWA5474	9.1	2	1B	A	A	A	A	B	B	A	A	B	B	A	B	B	A	B	A	A	B	B	B	B	A	B	B	A	A	B	A	A	A	B	A	A	B	B	B	A	A	A	A	B	A	A	B	B	A
IWA5278	9.1	2	1B	A	A	A	A	*	B	A	A	B	B	A	B	B	A	B	A	A	B	B	B	*	A	B	B	A	A	B	A	A	A	B	A	A	B	B	B	A	A	A	A	B	A	A	B	B	A
Xgwm107-136	9.69	2	1B	A	A	A	A	B	B	A	A	B	B	A	B	B	A	B	A	A	B	B	B	B	A	B	B	A	A	B	A	A	A	B	A	A	B	B	B	A	A	A	A	B	A	A	B	B	A
IWA554	10.64	2	1B	A	A	A	A	B	B	A	A	B	B	A	B	B	A	*	A	A	B	B	B	B	A	B	B	A	A	*	A	A	A	B	A	A	B	B	*	A	A	A	*	B	A	A	*	B	A
IWB52018	13.89	2	1B	A	A	B	A	B	B	A	A	B	B	A	B	B	A	*	A	A	B	B	B	B	A	B	B	A	A	*	A	A	A	B	A	A	B	B	*	A	B	A	*	B	A	A	*	B	A
IWB61864	26.38	2	1B	A	A	B	B	A	A	A	A	A	A	B	A	B	A	A	B	A	A	A	A	A	B	B	A	B	B	A	A	B	B	A	B	B	A	A	A	B	B	B	B	A	B	B	A	A	B
IWA8557	30.47	2	1B	A	A	B	B	A	A	A	A	A	A	B	A	B	A	A	A	A	A	A	A	A	B	B	A	B	A	A	A	B	B	A	B	B	A	A	A	B	B	B	B	A	B	B	A	B	B
IWA6294	47.4	2	1B	A	*	B	A	B	*	*	B	B	*	A	B	A	A	B	A	A	*	B	B	*	A	A	*	A	A	*	A	A	A	B	A	A	B	A	*	A	B	A	A	*	A	A	B	B	A
IWB13134	53.1	2	1B	A	B	B	A	B	B	B	B	B	A	A	B	A	A	B	A	A	A	B	B	B	A	A	B	A	A	B	A	A	A	B	A	A	B	A	B	A	B	B	A	B	A	A	B	B	A
Xwmc673	56.61	2	1B	A	B	B	A	B	B	B	B	B	A	A	B	A	A	B	A	A	B	B	B	B	A	A	B	A	A	B	A	A	A	B	A	A	B	A	B	A	B	B	A	B	A	A	B	B	A
IWB10933	72.76	2	1B	A	B	B	A	B	B	B	A	B	A	A	B	A	A	B	A	A	B	B	B	B	A	B	B	A	A	A	A	A	B	B	A	A	B	A	B	A	B	B	A	B	B	A	A	B	A
IWA1069	72.76	2	1B	A	B	B	A	B	B	B	A	B	A	*	B	A	A	B	A	A	B	B	B	B	A	B	B	A	A	A	A	A	B	B	A	A	B	A	B	A	B	B	A	*	B	A	A	B	A
IWB3140	74.76	2	1B	A	B	B	A	B	B	B	A	B	*	A	B	A	A	B	A	A	B	B	B	B	A	B	B	A	A	A	A	A	A	B	A	A	*	A	B	A	B	B	*	B	*	A	A	B	A
IWB27057	79.78	2	1B	A	B	B	A	B	B	B	A	B	A	A	B	A	A	B	A	A	B	B	A	B	A	B	B	A	A	A	A	A	B	B	A	A	B	A	B	A	B	A	A	B	B	A	A	B	A
IWA3998	95.68	2	1B	A	B	B	A	B	B	B	A	B	*	A	A	A	A	B	A	A	A	B	B	B	A	B	B	B	A	A	A	A	B	B	B	A	A	A	B	A	B	B	A	B	B	A	A	B	A
IWB7694	100.69	2	1B	A	B	B	A	A	B	B	A	B	A	A	A	A	A	B	A	A	A	B	*	B	A	B	B	B	A	A	A	A	B	B	B	A	A	A	B	A	B	B	A	B	B	A	A	B	A
IWA724	107.64	2	1B	A	B	A	A	A	B	B	A	B	B	A	A	A	A	B	A	A	A	B	*	B	A	B	B	B	A	A	A	A	B	B	B	A	A	A	B	A	A	B	A	A	B	A	A	B	A
IWA6831	117.2	2	1B	A	B	A	A	A	B	B	B	B	B	A	A	A	*	*	B	B	*	B	A	B	B	*	B	B	A	A	A	A	B	B	B	*	A	A	*	*	A	B	*	A	B	A	A	B	A
IWA5018	0	3	1D	A	A	A	B	B	A	A	A	B	B	A	B	A	*	A	A	A	A	B	A	B	A	A	B	A	B	A	B	A	B	A	B	A	B	B	*	B	B	B	A	*	B	B	B	A	A
IWA642	0.65	3	1D	A	A	A	B	B	A	A	A	B	B	A	B	A	B	A	A	A	*	B	A	B	A	A	B	A	B	A	B	A	B	A	B	A	B	B	B	B	B	B	A	A	B	B	B	A	A
IWB15847	0.65	3	1D	A	A	A	B	*	A	A	A	B	B	A	B	A	B	A	A	A	A	B	A	B	A	A	*	A	B	A	B	A	B	A	B	*	B	B	B	B	B	B	A	A	B	B	B	A	A
IWA3446	4.69	3	1D	*	A	A	A	B	*	*	A	B	B	A	B	A	*	A	A	A	*	B	A	*	A	A	B	*	B	A	A	*	B	A	B	A	B	B	B	*	B	B	A	A	B	B	*	A	A
IWA3481	11.18	3	1D	A	A	A	A	B	*	A	A	B	B	A	B	A	B	A	A	A	*	B	B	B	A	A	B	A	B	A	A	*	B	A	B	A	B	B	*	B	B	B	B	A	B	B	B	A	A
IWA6922	0	4	2A	B	A	B	B	B	B	*	A	*	B	B	*	*	*	A	B	*	*	B	B	*	*	*	A	*	A	B	A	*	A	B	B	*	*	*	A	*	B	B	*	A	B	*	*	A	B
IWA8274	17.65	4	2A	B	A	B	B	B	B	B	A	A	A	A	A	B	A	A	B	B	A	B	B	B	A	B	B	B	A	B	B	B	A	B	B	A	A	B	A	B	B	B	B	A	A	B	A	A	B
IWA422	21.92	4	2A	A	A	B	B	B	B	B	A	A	A	A	A	B	A	A	B	B	A	B	B	B	A	B	B	B	A	B	B	B	A	B	B	A	A	B	A	B	B	B	B	A	A	B	A	A	B
IWB23669	35.26	4	2A	A	A	B	B	B	B	B	A	A	A	A	A	B	*	A	B	B	*	B	B	*	A	A	B	B	B	A	B	B	A	B	B	A	*	B	A	A	B	B	A	A	A	A	*	A	B
IWA2526.2	45.72	4	2A	A	A	A	B	B	B	B	B	A	A	A	A	B	*	A	B	B	*	B	B	*	A	A	B	B	B	A	B	B	A	B	B	A	*	B	A	A	B	B	A	A	A	A	*	B	B
IWA2526	45.72	4	2A	A	A	A	B	B	B	B	B	A	A	A	A	B	*	A	B	B	*	B	B	*	A	A	B	B	B	A	B	B	A	B	B	A	*	B	A	A	B	B	A	A	A	A	*	B	B
IWA4214	49.92	4	2A	A	A	A	B	B	*	B	B	A	A	A	A	B	A	A	B	B	A	B	A	B	A	A	B	B	B	A	B	B	A	B	B	A	A	B	B	A	B	B	A	B	A	A	A	B	B
IWA4216	50.82	4	2A	A	A	A	B	B	B	B	B	A	A	A	A	B	A	A	B	B	*	B	A	B	A	A	B	B	B	A	B	B	A	B	B	A	A	B	B	A	*	B	A	A	A	A	A	B	B
Xwmc51-109	64.3	4	2A	A	A	A	B	B	B	B	B	A	A	A	B	B	A	A	B	B	B	A	A	B	A	A	B	B	B	A	B	B	A	B	A	A	A	B	B	A	A	B	A	A	A	A	A	B	B
IWA5068	89.79	4	2A	A	A	A	A	B	*	B	B	B	A	A	B	B	*	A	B	A	*	A	A	B	A	A	B	B	B	A	B	B	A	A	A	B	A	B	B	B	A	B	A	B	A	A	A	B	B
Ppo.A1.F2.R2	124.57	4	2A	*	A	A	A	B	B	B	A	A	A	A	A	B	A	A	B	A	*	B	B	B	B	B	B	B	B	B	B	B	A	A	A	A	A	*	B	A	B	A	A	A	*	*	A	A	*
IWA5216	124.57	4	2A	B	A	A	A	B	B	B	A	A	A	A	A	B	A	A	B	A	B	B	B	B	B	B	B	B	B	B	B	B	A	A	A	*	A	A	B	A	B	A	A	*	A	A	A	A	B
IWA5685	138.08	4	2A	B	A	B	A	*	*	A	A	A	A	B	A	B	A	A	B	B	*	B	A	B	B	B	A	B	B	*	A	B	A	A	A	A	A	A	A	*	B	A	B	A	A	A	B	A	B
IWB12554	143.82	4	2A	B	A	B	A	B	B	A	A	A	A	B	A	B	A	B	B	B	B	B	A	B	B	B	A	B	B	B	A	B	A	A	A	*	A	A	A	A	A	A	B	*	A	A	B	A	B
IWA6798	152.46	4	2A	B	A	B	A	B	B	A	A	A	A	*	A	B	A	A	B	B	B	B	A	*	A	B	A	B	B	B	A	B	A	A	A	A	A	A	A	A	B	A	B	B	A	A	B	A	B
IWA1348	157.64	4	2A	B	A	B	A	B	B	A	A	A	A	B	A	B	A	A	B	B	B	B	A	B	A	A	A	*	B	B	B	B	A	A	A	A	A	A	A	A	A	A	B	A	A	A	B	A	B
IWA1413	0	5	2B	*	A	B	A	A	A	B	A	B	A	A	A	*	A	*	A	B	*	B	A	B	A	B	B	A	A	B	A	A	B	A	A	B	B	B	B	A	B	A	B	A	A	B	*	A	B
IWA2304	9.38	5	2B	A	A	B	A	A	A	B	A	B	A	A	A	A	B	A	A	B	B	B	A	A	A	B	B	A	A	B	A	A	B	A	A	B	B	B	B	A	B	A	B	A	A	B	A	A	B
IWB22424	17.18	5	2B	B	A	B	A	A	A	B	A	B	A	A	A	A	B	A	A	B	B	A	A	B	A	B	B	A	A	A	A	A	B	A	A	B	B	B	B	A	B	A	B	A	A	B	A	A	B
IWA2115	29.36	5	2B	B	A	B	*	A	*	B	A	B	*	B	A	A	B	B	A	B	B	A	B	B	A	B	B	*	A	A	A	*	B	A	A	B	B	B	B	*	B	A	B	A	A	B	A	A	B
IWB6159	55.03	5	2B	B	A	B	*	A	*	B	B	B	*	B	A	A	B	B	A	B	B	A	B	B	A	B	B	*	A	A	A	*	B	A	B	A	B	B	A	*	B	B	B	A	B	B	A	A	B
IWB39653	57.7	5	2B	B	A	B	*	A	*	B	B	*	B	B	A	A	B	B	*	B	*	A	B	B	A	B	A	A	A	A	A	*	B	A	B	A	B	B	A	*	B	B	A	A	B	B	A	A	B
IWB7198	68.16	5	2B	A	A	B	*	A	*	*	B	*	*	B	A	A	B	B	*	B	*	A	B	B	A	B	B	A	B	A	A	*	B	A	B	A	*	B	A	*	B	B	B	A	B	B	A	A	B
IWB10669	69.86	5	2B	A	A	B	B	A	A	B	B	A	B	B	A	A	B	B	*	B	*	A	B	B	A	B	B	A	B	A	A	*	B	A	B	A	B	B	A	B	B	B	B	A	B	A	A	A	B
IWA3924	69.86	5	2B	A	A	B	*	A	*	B	B	*	B	B	A	*	B	B	*	B	*	A	B	B	A	B	B	A	B	A	A	*	B	A	B	A	B	B	A	*	B	B	B	*	B	A	A	A	B
IWB32439	74.09	5	2B	B	A	B	B	A	*	B	B	A	B	B	A	A	B	B	A	B	B	A	B	B	A	B	B	A	*	*	A	A	B	A	B	B	B	B	A	B	B	B	B	A	B	B	*	B	B
IWB10293	84.86	5	2B	B	B	B	B	A	*	B	B	A	B	B	A	A	B	B	A	B	B	A	B	B	A	B	B	A	*	*	A	A	B	A	B	B	B	B	A	B	A	B	B	B	B	B	*	B	B
IWB479	93.23	5	2B	B	B	B	A	A	A	B	B	A	B	B	A	A	B	B	A	B	B	A	B	B	A	B	B	A	A	A	A	A	B	A	B	B	B	B	A	B	A	B	A	B	B	B	B	A	B
IWB2875	115.41	5	2B	B	B	B	A	A	A	B	B	A	B	B	A	A	B	B	B	B	B	A	B	B	A	B	B	A	A	A	A	A	B	A	B	B	B	B	A	A	A	B	A	B	B	B	B	A	B
IWA3176	115.99	5	2B	B	B	B	A	A	A	B	B	A	B	B	A	A	B	B	B	B	B	A	B	B	A	B	B	A	A	A	A	A	B	A	B	B	B	B	A	A	A	B	A	*	B	B	B	A	B
IWB8029	115.99	5	2B	B	B	B	A	A	A	B	B	A	B	B	A	A	B	B	B	B	B	A	B	B	A	B	B	A	A	A	A	A	B	A	B	B	B	B	A	A	A	B	A	B	B	B	B	A	B
IWA3478	116.56	5	2B	B	B	B	A	A	A	B	B	A	B	B	A	A	B	B	B	B	B	A	B	B	A	B	B	A	A	A	A	*	B	A	B	B	B	B	A	A	A	B	A	B	B	B	B	A	B
IWB32050	0	6	2D	B	A	A	A	A	B	B	B	A	B	A	B	A	B	B	B	B	B	A	B	B	B	B	B	A	B	A	B	B	A	A	B	A	B	B	A	A	A	A	B	A	A	B	B	B	A
IWB46396	1.74	6	2D	B	A	A	A	A	B	B	B	A	B	A	B	A	B	B	B	B	B	A	B	B	B	B	B	A	B	A	B	B	A	A	B	A	B	B	A	*	A	A	B	A	A	B	B	B	*
IWA1858	9.14	6	2D	B	A	A	A	A	B	*	B	B	B	A	B	A	*	B	B	B	B	A	B	B	A	A	B	A	B	A	B	B	A	A	B	A	B	B	A	A	A	A	B	A	*	B	B	B	A
IWA6520.P	10.38	6	2D	B	A	A	A	A	B	*	B	B	B	A	B	A	*	B	B	B	*	A	B	B	A	A	B	A	B	A	B	B	A	A	B	A	B	B	A	A	A	A	B	A	*	B	B	B	A
IWA6520	10.38	6	2D	B	A	A	A	A	B	B	B	B	B	A	B	A	B	B	B	B	B	A	B	B	A	A	B	A	B	A	B	B	A	A	B	A	B	*	A	A	A	A	B	*	A	B	B	B	A
IWA609	15.77	6	2D	*	A	A	B	A	B	B	B	A	*	B	B	A	*	B	B	B	B	A	B	B	A	A	B	A	B	A	B	B	A	A	B	A	B	B	A	A	A	A	B	A	A	A	B	B	A
IWB59246	15.77	6	2D	B	A	A	B	A	B	B	B	A	B	B	B	A	B	B	B	B	B	A	B	B	A	A	B	A	B	A	B	B	A	A	B	A	B	B	*	A	A	A	B	*	A	A	B	B	A
IWA2414	16.51	6	2D	*	A	A	B	A	B	B	B	A	B	B	B	A	*	B	B	B	B	A	*	B	A	A	B	A	B	A	B	*	A	A	B	A	B	B	A	A	A	A	B	A	A	A	*	B	A
IWA851	0	7	3A	B	B	B	A	A	A	A	A	A	B	B	A	B	*	B	A	B	A	*	B	A	A	B	B	A	B	A	B	B	B	B	B	A	A	B	B	A	B	B	A	B	B	B	A	B	B
IWA8127	4.98	7	3A	B	B	B	A	A	A	A	A	A	*	*	A	B	A	*	*	B	A	B	*	A	A	*	B	A	B	A	B	B	A	*	B	A	A	B	A	A	*	B	A	B	B	B	A	B	A
IWB72256	9.57	7	3A	B	B	B	A	A	A	A	A	A	B	B	A	B	A	B	A	B	A	B	B	A	A	B	B	A	B	*	B	B	A	B	B	A	A	B	A	A	B	B	A	B	B	B	A	B	A
IWA8106	14.29	7	3A	B	B	B	A	A	A	A	A	A	B	B	A	B	*	B	A	B	A	B	B	A	A	B	B	B	B	B	B	B	A	B	B	*	A	B	A	A	B	B	A	B	B	B	A	B	A
IWA5050	21.54	7	3A	B	A	B	A	A	A	A	A	A	B	B	B	B	*	B	A	B	A	B	B	A	A	B	B	B	B	B	B	B	A	B	B	*	A	B	A	A	B	B	B	B	B	B	A	B	A
IWB2275	33.16	7	3A	A	A	B	B	A	A	A	A	A	B	B	B	B	A	A	A	B	A	B	B	A	B	B	B	B	B	B	B	B	A	B	B	A	A	B	A	B	B	B	B	B	B	B	B	B	A
IWB8516	33.16	7	3A	A	A	B	B	A	A	A	A	A	*	B	B	B	A	A	A	B	A	B	B	A	B	B	B	B	B	B	B	B	A	B	B	A	A	B	A	B	B	B	B	B	B	B	B	B	A
IWA4675	49.28	7	3A	A	A	A	B	A	B	A	A	B	B	B	B	B	*	*	A	B	A	B	B	A	A	B	*	B	B	B	B	B	A	B	B	A	A	*	A	B	B	B	B	B	B	B	B	B	B
IWA1713	58.65	7	3A	A	A	A	B	A	B	A	A	B	B	B	B	B	A	A	A	B	A	B	B	A	A	B	A	B	A	B	B	B	B	B	B	A	A	B	A	B	B	B	B	B	B	B	B	B	B
IWA1699	64.74	7	3A	A	A	A	B	A	B	A	A	B	B	B	B	B	A	A	A	B	A	B	B	A	A	B	B	B	A	B	B	B	B	B	B	A	A	B	A	B	B	B	B	B	B	*	B	B	B
IWB20961	68.26	7	3A	A	B	A	*	A	B	A	A	B	B	B	B	B	A	A	A	B	A	B	*	A	A	*	A	B	A	B	*	B	B	B	B	A	A	B	A	B	B	B	B	B	B	B	*	B	B
IWA5285	73.73	7	3A	A	A	A	B	A	B	B	A	B	B	B	B	B	A	A	A	B	A	B	B	A	A	B	A	B	A	B	B	B	B	B	B	A	A	B	A	B	B	B	B	B	B	B	B	B	B
IWB58656	83.33	7	3A	A	A	A	B	A	B	B	A	B	B	A	A	B	A	A	A	B	A	B	B	A	A	B	A	B	A	B	B	B	B	B	B	A	A	B	A	B	B	B	B	B	B	B	B	B	B
IWA524	109.45	7	3A	B	A	B	B	A	A	*	A	B	B	A	A	*	A	A	A	*	A	A	B	A	A	B	A	B	A	B	B	A	B	A	B	A	A	B	A	B	B	B	A	*	B	A	B	B	A
IWA7647	0	8	3B	*	A	A	B	A	*	A	A	B	A	*	*	A	*	A	A	B	*	A	A	A	A	B	B	*	B	A	B	A	A	A	A	B	B	B	B	A	B	B	B	B	A	A	B	B	B
IWA288	0	8	3B	A	A	A	B	A	B	A	A	B	A	B	B	A	*	A	A	B	A	A	A	A	A	B	B	A	B	A	B	A	A	A	A	B	B	B	B	A	B	B	B	B	A	A	B	B	B
IWB57994	1.37	8	3B	A	*	A	B	A	B	*	*	B	*	B	B	*	B	*	*	B	A	A	A	*	A	B	B	A	B	A	B	A	*	*	A	B	B	B	B	*	B	B	B	B	A	A	B	B	B
IWB54838	15.19	8	3B	A	A	*	B	A	B	B	A	B	*	B	A	A	A	A	B	B	A	A	A	B	A	B	B	A	B	A	B	A	A	A	A	B	B	B	B	A	B	B	A	B	*	A	B	B	B
IWB49268	15.19	8	3B	A	A	A	B	A	B	B	A	B	*	B	A	A	A	A	B	B	A	A	A	B	*	B	B	A	B	A	B	*	A	A	*	B	B	B	B	A	B	B	A	B	A	A	B	B	B
IWA3983	21.42	8	3B	A	B	A	B	A	B	B	A	B	B	A	A	A	A	A	B	B	A	*	A	B	A	B	A	A	B	*	B	A	A	A	A	B	B	B	B	A	B	B	A	B	A	A	B	B	B
IWB36611	26.37	8	3B	A	B	A	B	A	B	B	A	B	B	B	A	A	A	A	B	B	A	A	A	B	A	B	B	A	B	A	*	A	A	B	A	B	B	B	B	A	B	B	A	B	A	A	B	B	B
IWB25047	28.7	8	3B	A	B	A	B	A	B	B	*	B	*	B	A	*	*	*	B	B	A	A	A	B	A	*	B	A	B	A	B	A	A	*	A	*	B	*	B	A	B	B	A	B	*	A	B	B	B
IWB23272	28.7	8	3B	A	B	A	B	A	B	B	*	*	B	*	*	*	*	A	B	B	A	A	A	*	A	A	B	A	B	A	B	*	*	*	A	A	B	B	B	A	B	*	A	B	*	A	*	*	B
IWA2990	28.7	8	3B	A	B	A	B	A	*	B	A	B	B	B	A	A	A	A	B	B	A	A	A	B	A	A	B	A	B	A	B	A	A	B	A	A	B	B	B	A	B	B	A	B	A	A	B	B	B
IWB10723	29.41	8	3B	A	B	A	B	A	B	B	A	B	B	B	A	A	A	A	B	B	*	A	A	B	A	A	B	A	B	A	B	A	*	B	A	A	B	B	B	*	B	B	A	B	*	A	B	B	B
IWB10591	31.45	8	3B	A	B	A	B	A	B	B	A	B	B	B	A	A	A	A	B	B	A	A	A	B	A	A	B	A	B	A	B	A	A	B	A	B	B	B	B	A	B	B	A	B	A	A	B	B	*
IWA4236	34.94	8	3B	A	B	A	B	A	B	B	A	B	B	B	A	A	*	A	B	B	A	A	A	B	A	A	B	A	B	A	B	A	A	B	A	A	B	B	B	A	B	B	A	A	A	A	B	B	B
IWB34349	34.94	8	3B	A	B	A	*	A	*	B	A	B	*	B	A	A	A	A	B	B	*	A	A	B	A	A	B	A	B	A	B	*	A	B	A	A	B	B	B	*	B	B	A	A	A	A	B	B	B
IWB281	34.94	8	3B	A	B	A	B	A	*	B	A	B	B	B	A	*	A	A	B	B	*	A	A	B	A	A	B	A	B	A	B	*	A	B	A	A	B	B	B	*	B	B	A	A	A	A	B	B	B
IWA3218	34.94	8	3B	A	B	A	B	A	*	B	A	B	B	B	A	A	A	*	B	B	A	A	A	B	A	A	B	A	B	A	B	*	A	B	A	A	B	B	B	*	B	B	A	A	A	A	B	B	B
IWB2841	34.94	8	3B	A	B	A	B	A	*	B	A	B	B	B	A	A	A	A	B	B	A	A	A	B	A	A	B	A	B	A	B	*	A	B	A	A	B	B	B	*	B	B	A	A	A	A	B	B	B
IWB12510	35.57	8	3B	A	B	A	B	A	*	B	A	B	*	B	A	A	A	A	B	B	*	A	A	B	A	A	B	A	B	A	B	*	A	B	A	A	B	B	B	*	B	B	A	A	A	A	B	B	B
IWB41148	35.57	8	3B	A	B	A	B	A	B	B	A	B	*	B	A	A	A	A	B	B	A	A	A	B	A	A	B	A	B	A	B	*	*	B	A	A	B	B	B	*	B	B	A	A	A	A	B	B	B
IWA6297	40.06	8	3B	A	*	A	B	A	B	B	*	B	*	*	A	A	A	A	B	B	A	A	A	*	A	A	B	A	B	A	A	*	*	B	B	A	B	B	B	*	B	B	A	A	A	A	B	B	B
IWA7516	41.6	8	3B	A	*	A	B	A	B	B	A	B	B	B	A	A	A	A	B	B	A	A	A	A	A	A	B	A	B	A	A	A	A	B	A	A	B	B	B	A	B	B	A	A	A	A	B	B	B
IWB2271	54.36	8	3B	A	B	A	B	A	B	B	A	B	B	B	A	A	A	A	A	A	A	A	A	A	A	A	B	A	B	A	A	A	A	B	A	A	B	B	B	A	B	B	A	B	A	A	B	B	B
IWA5648	0	9	4A	A	B	A	A	A	B	B	A	B	B	A	B	A	A	B	A	A	B	B	B	*	A	B	A	B	A	B	B	*	A	A	B	B	B	B	B	*	B	*	B	A	B	*	*	B	B
IWA1969	0	9	4A	A	B	A	A	A	B	B	A	B	B	A	B	A	A	B	A	A	B	B	B	B	A	B	A	B	A	B	B	A	A	A	B	B	B	B	B	A	B	B	B	*	B	A	A	B	B
IWA4320.2	9.47	9	4A	A	B	A	A	A	B	B	A	B	A	A	B	B	B	B	A	A	B	B	B	B	A	B	A	B	B	B	A	A	A	A	B	B	B	B	B	A	B	B	B	A	B	A	A	B	B
IWA4320	10.13	9	4A	A	*	A	A	A	B	*	A	B	A	A	B	B	*	B	A	*	B	B	B	*	A	B	A	*	B	B	A	A	A	A	B	B	B	B	B	A	B	B	*	A	B	A	A	B	B
IWA1711	19.34	9	4A	A	B	A	A	A	B	B	B	B	B	A	B	A	A	B	A	B	B	B	B	B	A	B	A	B	A	B	B	A	B	A	A	B	*	B	B	A	B	B	A	A	B	A	A	B	B
IWA7535	23.45	9	4A	A	B	A	A	A	B	B	B	B	B	A	B	A	A	B	A	B	B	B	B	B	A	B	A	B	A	B	B	A	B	A	A	B	*	B	B	A	B	A	A	A	B	A	A	B	B
IWA2582	26.39	9	4A	A	B	A	A	A	B	B	B	B	B	A	B	A	A	B	A	B	A	B	B	*	A	B	A	B	A	*	B	A	A	A	A	B	B	B	*	*	*	A	A	A	B	A	*	B	B
IWB35095	33.21	9	4A	A	B	B	B	A	A	B	B	B	B	A	B	A	A	B	A	B	A	B	A	B	A	B	A	B	A	*	B	A	A	A	A	B	B	B	*	A	*	A	A	A	B	A	*	B	B
IWA2904	49.43	9	4A	A	B	B	B	A	A	B	B	B	B	A	B	B	A	A	A	B	A	B	A	B	A	B	A	B	A	B	A	A	A	A	A	B	B	B	B	A	B	A	A	A	B	A	A	B	B
IWA3756	58.45	9	4A	A	B	B	B	A	A	B	A	B	B	A	*	B	A	A	A	B	A	B	A	B	A	B	A	B	A	B	A	A	A	A	A	A	B	B	B	A	B	A	*	B	B	A	A	A	B
IWB12737	74.4	9	4A	A	B	B	B	*	A	*	A	B	B	A	B	B	*	A	A	B	A	B	A	B	A	B	A	B	A	B	A	B	A	A	B	*	B	B	*	A	A	A	A	*	B	A	A	A	B
IWB4308	84.78	9	4A	A	B	B	B	*	A	*	A	B	B	A	B	B	*	A	A	B	B	A	A	B	B	B	A	B	A	B	A	B	A	A	B	*	B	A	*	A	A	B	A	*	B	A	A	A	B
IWA3698	88.33	9	4A	A	B	B	B	A	A	A	A	B	B	A	B	B	A	A	A	B	B	A	A	B	B	B	A	B	A	B	A	B	A	A	B	A	B	A	B	A	A	B	A	A	A	A	B	A	B
IWB9906	89.56	9	4A	A	B	B	B	A	A	A	A	B	B	A	B	B	A	A	A	B	B	A	A	B	B	B	A	B	A	B	A	B	A	A	B	A	B	A	B	A	A	B	A	A	A	A	B	A	B
IWA1768	0	10	4B	*	*	A	A	B	A	A	B	B	B	B	A	A	A	B	A	A	B	A	A	A	B	A	A	A	A	B	A	A	*	A	B	B	B	A	B	A	A	A	A	A	A	A	A	B	B
IWA3615	11.71	10	4B	B	B	A	A	B	B	A	B	B	B	B	A	A	A	B	A	A	B	B	A	*	B	A	A	A	A	B	A	A	B	B	B	A	B	A	B	A	A	A	A	*	A	A	A	B	B
IWB73384	11.71	10	4B	B	B	A	A	B	B	A	B	B	B	B	A	A	A	B	A	A	B	B	*	B	B	A	*	A	A	B	*	A	B	B	B	A	B	A	B	A	A	A	*	A	A	A	A	B	B
IWB73001.P	30.56	10	4B	B	B	A	A	*	B	B	B	B	*	A	A	*	*	A	A	A	*	*	B	B	B	A	A	A	A	B	A	A	B	B	*	*	B	A	B	A	A	A	A	A	*	A	A	B	A
IWB73001	30.56	10	4B	B	B	A	A	B	B	B	B	B	B	A	A	B	B	A	A	A	*	B	B	B	B	A	A	A	*	B	A	A	B	B	A	B	B	A	B	A	A	A	A	A	B	A	A	B	A
IWB5676	32.75	10	4B	B	B	A	A	B	B	B	B	B	B	A	A	B	B	A	A	A	B	B	B	B	B	A	A	A	*	B	A	A	B	B	A	B	B	A	B	A	A	A	A	A	B	A	A	B	A
IWA6898.H	41.42	10	4B	B	B	A	A	A	B	B	B	A	A	A	A	B	B	A	A	A	B	B	B	B	B	A	A	A	A	B	A	A	B	B	A	B	B	A	B	A	*	A	A	B	B	B	A	A	A
IWA6898.P	43.33	10	4B	B	B	A	*	A	B	B	B	*	A	A	A	B	B	A	*	A	*	B	B	B	B	A	A	A	A	B	A	A	B	B	A	B	B	A	B	A	A	A	A	*	B	B	A	A	A
IWA6898	44.56	10	4B	B	B	A	A	A	B	B	B	A	A	A	A	B	B	A	A	A	A	B	B	B	B	A	A	A	A	B	A	A	B	B	A	B	B	A	B	A	A	A	A	A	B	B	A	A	A
IWA3846	44.56	10	4B	B	B	A	A	A	B	B	B	A	A	A	A	B	B	A	A	A	*	B	B	B	B	A	A	A	A	B	A	A	B	B	A	B	B	A	*	*	A	A	*	A	B	B	A	A	A
IWB12434	46.36	10	4B	B	B	*	A	A	B	B	B	A	A	A	A	B	B	A	A	A	A	B	B	B	B	A	A	A	A	B	A	*	B	B	A	B	B	A	B	A	*	*	A	*	B	B	*	A	A
IWB27042	61.21	10	4B	B	B	A	A	A	B	B	B	A	A	A	A	B	*	B	A	A	*	B	B	*	B	A	A	A	A	B	A	A	B	B	A	B	B	A	B	B	A	A	A	A	B	B	A	A	A
IWB7462	66.71	10	4B	B	B	A	A	A	*	B	B	A	A	A	B	B	*	B	A	A	*	B	B	*	B	A	A	A	A	B	A	A	B	B	B	*	B	A	B	B	A	A	A	A	B	B	A	A	A
IWB10640	69.9	10	4B	B	B	A	A	A	B	B	B	A	A	A	B	B	*	B	A	A	A	B	B	B	B	A	A	A	A	B	A	A	B	B	B	B	B	A	B	B	A	A	A	A	B	B	A	A	A
IWA2031	71.64	10	4B	B	B	A	A	A	B	B	B	A	A	A	B	B	B	B	A	A	A	B	B	B	B	A	A	A	A	B	A	A	B	B	B	B	B	A	B	B	A	A	A	A	B	B	A	A	A
IWA2595	73.66	10	4B	B	B	A	A	A	*	B	B	A	A	A	B	B	*	*	A	A	*	B	B	B	B	A	*	A	A	B	A	*	B	B	*	B	B	A	B	B	A	A	A	A	B	B	*	A	A
IWA5520	80.32	10	4B	B	B	A	A	B	*	B	B	A	B	A	B	B	*	*	A	A	*	B	B	B	B	A	A	A	A	B	A	A	B	B	*	B	B	A	B	B	A	A	A	A	A	B	*	A	A
IWA4445	0	11	5A	B	A	B	*	A	*	A	*	B	A	*	A	B	B	A	A	B	*	A	A	B	B	B	B	B	*	A	B	B	A	A	B	B	A	A	B	*	B	B	A	B	*	A	B	*	A
IWB5867	14.05	11	5A	A	B	B	A	*	B	A	A	B	B	B	A	*	B	A	A	B	A	A	A	B	B	B	B	B	B	A	B	B	A	A	B	*	A	A	B	A	B	B	A	B	B	B	B	A	A
IWA1569	19.88	11	5A	A	B	B	A	*	B	A	A	B	B	B	A	*	B	A	A	B	A	A	A	B	B	B	B	B	B	B	B	B	A	A	*	*	A	A	B	A	B	B	A	A	B	B	B	A	A
IWB56308	26.91	11	5A	*	*	B	A	B	B	A	*	B	*	B	A	B	*	A	A	B	A	A	B	A	B	B	B	B	B	B	B	B	A	A	B	*	A	B	B	A	*	B	B	*	B	B	B	A	B
IWB11853	31.64	11	5A	A	B	*	A	B	B	A	A	B	B	B	A	*	B	A	A	B	A	A	B	*	B	B	B	B	*	B	B	*	A	A	B	B	A	B	B	A	B	B	B	A	*	B	B	A	B
IWB25262	33.25	11	5A	A	B	*	A	B	B	A	A	B	B	B	B	*	B	A	A	B	A	A	B	*	B	B	B	B	B	B	B	B	A	A	B	B	A	B	B	A	B	B	B	A	B	B	B	A	B
IWB7690	49.14	11	5A	A	B	B	A	B	A	B	B	B	B	*	B	B	B	A	A	B	*	A	B	*	B	B	B	B	B	*	A	B	A	A	B	A	A	B	B	A	B	B	B	*	B	A	B	*	B
IWA122	57.12	11	5A	A	B	B	A	A	A	B	B	B	B	B	*	B	*	A	A	B	*	A	B	B	B	B	B	B	B	B	B	B	A	B	B	A	A	B	B	A	B	B	B	A	B	B	B	A	A
IWA4734	59.93	11	5A	A	B	B	A	A	A	*	B	B	B	B	*	*	*	A	*	B	*	A	B	B	B	B	*	B	*	B	*	*	A	*	B	A	A	B	*	A	B	B	B	*	*	B	B	A	A
IWA4668	70.89	11	5A	A	B	A	A	A	A	B	A	B	B	B	B	B	B	*	A	B	A	A	B	*	B	B	B	B	B	B	A	B	A	A	B	A	A	B	B	A	B	B	B	A	B	B	B	A	A
IWB22035	74.74	11	5A	A	B	A	A	A	A	B	A	B	B	B	B	B	B	A	A	B	A	A	B	B	B	B	B	B	B	B	A	B	A	B	B	A	A	*	B	A	B	B	B	A	B	B	B	A	A
IWB7095	84.07	11	5A	A	B	A	A	A	A	B	A	A	B	B	B	B	B	A	A	A	A	A	B	B	B	B	B	B	B	B	A	B	B	B	B	A	A	*	B	A	B	B	B	B	B	B	B	A	A
IWA6683	111.65	11	5A	A	A	B	*	A	*	B	*	A	B	*	B	A	B	A	A	A	*	A	A	*	B	A	B	B	B	B	B	B	B	B	B	A	*	A	A	*	B	A	B	B	A	B	*	A	A
IWA4814	115.9	11	5A	A	A	B	A	A	B	B	A	A	A	B	B	A	B	A	A	A	B	A	A	B	B	A	A	B	B	B	B	B	B	B	*	A	A	A	A	B	B	A	B	B	A	B	B	A	A
IWA2352	130.01	11	5A	A	A	B	A	A	B	B	A	A	A	B	B	B	B	A	A	A	B	B	B	A	B	A	A	B	B	B	B	B	B	A	B	A	B	A	A	B	B	B	A	B	A	B	B	A	A
IWA2113	145.86	11	5A	A	A	B	A	A	B	*	A	A	A	B	A	B	*	B	*	A	B	B	B	A	B	A	A	A	B	B	B	B	B	A	B	B	B	B	A	A	B	B	A	B	A	B	B	A	A
IWA821	145.86	11	5A	A	A	B	A	A	B	B	*	A	A	B	A	B	B	B	A	A	B	B	B	A	B	A	A	A	B	B	B	B	B	A	B	B	B	B	A	A	B	B	A	*	A	B	B	A	A
IWB11244	155.42	11	5A	*	A	*	A	*	B	B	A	*	A	*	B	B	B	B	A	A	B	*	B	*	B	A	A	A	B	B	*	B	*	A	A	B	B	B	A	A	B	B	A	B	*	*	B	A	A
IWA2837	159.98	11	5A	A	A	B	A	A	B	B	A	A	A	B	B	B	B	B	A	*	B	B	*	B	B	A	A	A	*	B	*	*	B	A	A	*	B	B	A	A	B	B	A	*	A	B	B	A	A
IWB10802	159.98	11	5A	A	A	B	*	A	B	B	A	A	A	B	B	B	B	B	A	B	B	B	B	*	B	A	A	A	B	*	B	*	*	A	A	B	B	B	A	*	B	*	*	*	A	B	B	A	*
IWB47624	160.71	11	5A	A	A	B	A	A	B	B	A	A	A	B	B	B	B	B	A	B	B	B	B	B	B	A	A	A	B	B	B	B	B	A	A	B	B	B	A	A	B	B	A	B	A	B	B	A	A
IWA3606	0	12	5B7BS	A	A	B	A	B	*	A	A	*	A	B	B	A	*	A	*	B	*	A	A	B	B	A	A	B	A	A	B	B	B	*	B	A	*	A	B	A	A	B	A	A	A	A	B	A	A
IWA6947	16.58	12	5B7BS	A	A	A	B	B	A	A	A	A	A	A	B	A	A	A	A	B	A	A	A	A	B	A	A	B	A	A	B	B	B	A	B	B	A	A	B	A	A	B	A	A	A	A	B	A	*
IWA3211	18.44	12	5B7BS	*	A	B	B	B	*	A	A	A	A	A	B	A	*	A	*	B	*	A	A	*	B	A	A	B	A	A	B	B	*	A	B	B	B	A	*	*	*	*	A	A	A	A	*	A	*
IWA3033	24.89	12	5B7BS	A	A	B	A	B	A	A	A	A	A	A	B	A	A	A	A	B	A	A	A	A	B	A	A	B	A	A	A	A	B	A	B	B	A	A	B	A	A	B	A	A	A	A	B	A	A
IWA6689	41	12	5B7BS	A	*	B	B	B	A	A	A	B	A	A	A	B	A	A	B	B	A	B	*	B	B	A	A	B	A	*	B	B	B	A	B	B	B	A	B	A	*	B	A	A	A	A	B	A	A
IWB2463	51.32	12	5B7BS	A	A	B	B	B	A	A	A	A	A	A	A	B	A	A	B	B	B	B	A	B	B	A	*	B	A	B	B	B	B	A	B	A	A	A	B	A	A	B	A	A	A	A	B	A	A
IWA951.2	54.18	12	5B7BS	A	A	B	B	B	A	A	A	A	A	A	A	B	A	A	B	B	B	B	A	B	B	A	A	B	A	B	B	B	B	A	B	A	A	A	B	A	A	B	A	A	A	A	B	A	A
IWB36688	54.18	12	5B7BS	A	A	B	B	B	A	A	A	A	A	A	A	*	A	A	B	B	B	B	A	B	B	A	A	B	A	B	B	B	B	A	B	A	A	A	B	A	*	B	A	A	A	A	B	A	A
IWB3498	54.79	12	5B7BS	A	A	B	B	B	A	A	A	A	A	A	A	B	A	A	B	B	B	B	A	B	B	A	A	B	A	B	B	B	B	A	B	A	A	A	B	A	A	B	A	A	A	A	B	A	A
IWB2878	57.62	12	5B7BS	A	A	B	B	B	A	A	A	A	A	A	A	B	A	A	B	B	B	B	A	B	B	A	A	B	A	B	A	B	B	A	B	A	A	A	B	A	A	B	A	A	A	A	B	A	A
IWA952.2	60.47	12	5B7BS	A	A	B	B	B	A	A	A	A	A	A	A	B	A	A	B	B	B	B	A	B	B	A	A	B	A	B	B	B	B	A	B	A	A	A	B	A	A	B	A	A	A	A	B	A	A
IWB12028	61.45	12	5B7BS	A	A	*	B	B	A	*	*	A	A	*	A	B	A	A	B	B	B	B	A	*	B	A	A	B	A	*	B	B	B	A	*	A	A	A	*	*	*	*	*	A	A	A	B	A	*
IWB1131	62.43	12	5B7BS	A	A	B	B	B	A	A	A	A	A	A	A	B	A	A	B	B	B	B	A	B	B	A	A	B	A	B	B	B	B	A	B	A	A	A	B	A	A	A	A	A	A	A	B	A	A
IWA4280	69.33	12	5B7BS	A	A	B	B	B	A	A	A	A	A	A	A	B	A	A	B	B	B	B	A	B	B	A	A	B	A	A	B	B	B	A	B	A	A	A	B	A	A	B	A	A	A	A	B	A	A
IWA951	75.51	12	5B7BS	A	A	*	*	B	A	A	A	A	A	A	A	*	A	A	*	*	B	B	A	*	*	A	A	B	A	*	*	*	*	A	*	A	A	A	*	A	A	B	A	A	A	A	B	A	A
IWA952	78.69	12	5B7BS	A	A	B	*	B	A	A	A	A	A	A	A	*	A	A	B	B	B	B	A	*	*	A	A	B	A	B	*	B	*	A	*	A	A	A	*	A	A	*	A	A	B	A	B	A	A
IWB2665	83.47	12	5B7BS	*	A	B	B	B	A	A	A	A	A	A	A	B	A	A	B	B	B	B	A	B	B	A	A	B	*	B	B	B	B	A	B	A	A	A	B	A	*	B	A	A	A	*	B	A	*
IWB14185	84.11	12	5B7BS	A	A	B	B	B	A	A	A	A	A	A	A	B	A	A	B	B	B	B	A	B	B	A	A	B	A	B	B	B	B	A	B	A	A	A	B	A	A	B	A	A	A	A	B	A	A
IWB65241	89.4	12	5B7BS	A	A	B	B	B	A	A	A	A	A	A	A	B	A	A	B	B	A	B	A	B	B	A	A	A	A	B	B	B	B	A	B	A	A	A	B	A	A	B	A	A	A	A	B	A	A
IWB44988	95.31	12	5B7BS	A	A	B	B	B	A	A	A	A	A	A	A	B	A	A	B	B	A	B	A	*	B	A	A	B	A	B	B	*	*	A	B	*	A	A	B	A	*	B	A	A	A	A	B	A	A
IWB7678	105.86	12	5B7BS	A	A	B	B	B	A	A	A	A	A	A	A	B	A	A	B	B	A	B	A	B	B	A	A	B	B	A	B	B	B	A	B	B	A	A	B	A	A	B	A	A	A	A	B	A	A
IWB12343	110.42	12	5B7BS	A	A	B	B	B	A	A	A	A	A	*	A	B	A	A	B	B	A	*	A	B	B	A	A	B	A	A	B	B	B	A	B	*	*	A	B	A	*	B	A	A	*	A	B	A	A
IWA5280	111.09	12	5B7BS	A	A	B	B	B	A	A	A	B	*	A	A	B	A	A	B	B	A	B	A	B	B	A	A	B	A	A	B	*	B	A	B	B	B	A	B	A	A	B	A	A	A	A	B	A	A
IWA1777	111.09	12	5B7BS	A	A	B	B	B	*	A	*	B	*	A	*	B	A	A	B	B	*	B	A	B	B	A	*	B	A	A	B	B	B	A	B	B	B	A	B	A	A	B	A	A	A	A	B	A	A
IWA6065	113.12	12	5B7BS	A	A	B	B	B	A	A	A	B	A	A	A	B	A	A	B	B	A	A	A	B	B	A	A	B	A	A	B	B	B	A	B	*	B	A	B	A	A	B	A	A	A	A	B	A	A
IWA6065.H	114.28	12	5B7BS	A	A	B	B	B	A	A	A	B	A	A	A	B	A	A	B	B	A	A	A	B	B	A	A	B	A	A	B	B	B	A	B	B	B	A	B	A	A	B	A	A	A	A	B	A	A
IWA7830	117.66	12	5B7BS	A	A	B	B	B	A	A	A	B	A	A	A	B	A	A	A	B	A	A	A	A	B	A	A	B	A	A	B	B	B	A	B	A	A	A	B	A	A	B	A	A	A	A	B	A	A
IWA3663	123.04	12	5B7BS	A	A	B	B	B	A	A	A	A	A	A	A	B	A	A	A	B	*	A	A	A	B	A	A	B	A	A	B	B	B	A	B	A	A	A	B	A	A	B	A	A	*	A	B	A	*
IWA4549	131.82	12	5B7BS	A	A	B	B	B	A	A	A	*	A	B	A	B	A	*	A	B	*	B	A	A	B	A	A	B	B	A	B	A	B	A	B	A	A	A	B	A	A	B	*	A	A	A	B	A	A
IWB12645	138.06	12	5B7BS	A	A	B	B	B	A	A	A	A	A	B	A	B	A	A	A	A	B	B	A	A	B	A	A	B	B	A	B	*	B	A	B	A	A	A	B	A	A	B	A	A	A	B	B	A	A
IWA2827	0	13	5BL	*	A	B	B	B	A	B	A	A	A	B	A	A	B	B	B	A	B	B	A	A	A	A	B	B	A	A	B	A	A	B	B	A	A	B	A	A	B	A	B	B	A	A	A	A	A
IWA936	7.37	13	5BL	A	A	B	B	B	A	B	A	A	*	B	A	A	B	B	B	A	B	B	A	A	A	A	*	B	A	A	B	A	A	B	B	A	A	B	A	A	B	A	B	B	*	A	A	A	A
IWB56115	13.99	13	5BL	A	A	B	B	B	A	B	A	*	A	B	B	A	B	B	B	A	B	B	A	*	A	A	B	B	A	A	B	A	A	B	B	A	B	B	A	A	B	A	*	B	A	A	A	A	B
IWA3185	13.99	13	5BL	A	A	B	B	B	A	B	A	A	*	*	B	A	B	B	B	A	*	B	A	*	A	A	B	B	*	A	B	A	A	B	B	A	B	B	A	A	B	A	B	*	A	A	A	A	B
IWA4903	28.57	13	5BL	A	B	B	B	B	A	A	B	A	A	A	B	A	B	B	A	B	B	B	A	A	A	A	B	B	A	A	A	A	A	B	B	A	B	B	B	A	B	A	B	A	A	A	B	A	B
IWA3423	0	14	7BL	*	A	B	B	B	A	A	A	B	A	B	A	B	A	A	A	B	A	*	*	*	B	A	A	B	A	A	B	*	B	B	B	*	A	A	B	A	A	B	B	A	*	A	B	A	B
IWB72124	0	14	7BL	A	A	B	B	B	A	A	A	B	*	B	A	B	A	A	A	B	A	A	A	*	B	A	A	*	A	A	B	B	B	B	B	A	*	A	B	A	A	B	B	A	*	A	*	*	B
IWB10895	4.14	14	7BL	A	A	B	B	B	*	A	A	B	B	B	A	B	*	A	A	B	A	*	A	A	*	*	A	B	A	A	B	B	*	B	B	A	A	A	B	*	A	B	B	B	A	A	*	A	B
IWA6618	7.97	14	7BL	A	A	B	B	B	*	A	A	B	A	B	A	B	*	A	*	B	*	A	A	*	B	A	A	B	A	A	B	B	B	B	B	A	*	A	B	*	A	B	B	A	B	A	*	A	B
IWA1340	8.68	14	7BL	*	A	B	B	B	A	A	A	B	A	B	A	B	A	A	B	B	A	A	A	*	B	A	A	B	*	A	B	B	B	B	B	*	A	A	B	A	A	B	B	A	A	A	B	A	B
IWA320	10.02	14	7BL	*	A	B	B	A	A	A	A	B	A	B	A	B	*	A	*	B	A	A	A	*	B	A	A	B	A	A	B	B	B	B	B	*	*	A	B	A	*	*	B	A	A	A	B	A	B
IWA394	10.02	14	7BL	A	A	B	B	A	A	A	A	B	A	B	*	B	A	A	*	B	A	A	A	*	B	A	A	B	A	A	B	B	B	B	B	*	*	A	B	A	A	B	B	*	A	A	B	A	B
IWA8570	10.02	14	7BL	A	A	B	B	*	A	A	A	*	A	B	A	B	A	A	*	B	A	A	A	*	*	A	A	B	A	A	B	B	B	B	*	*	*	A	B	*	A	B	B	A	*	A	B	A	B
IWB28757	16.13	14	7BL	A	A	B	B	B	A	A	A	A	A	B	A	B	A	A	B	B	A	A	A	A	B	A	A	A	A	A	B	B	B	B	B	B	B	A	B	A	A	B	A	A	A	A	B	A	B
IWB56856	19.02	14	7BL	A	A	B	B	B	A	A	A	A	A	B	A	B	A	A	B	B	A	A	A	A	B	A	A	A	A	B	A	B	B	B	B	B	B	A	B	A	A	A	A	A	A	A	B	A	B
Xgwm107-171	38.94	14	7BL	A	A	B	B	A	A	A	A	B	A	B	A	B	A	A	B	B	B	B	A	B	B	A	A	A	B	B	A	B	B	B	B	B	B	A	B	A	A	A	B	A	A	A	B	A	B
IWA3513	60.4	14	7BL	A	A	B	B	A	A	A	A	B	A	B	A	A	A	A	*	B	B	A	A	A	A	A	A	A	B	B	A	A	B	B	B	*	A	A	A	A	A	A	B	A	A	A	B	A	B
IWB45006	73.26	14	7BL	A	A	B	B	A	A	A	B	A	A	A	B	A	A	A	A	B	B	A	A	A	A	A	B	A	B	B	A	A	B	B	B	*	*	A	A	A	A	A	B	A	*	A	B	B	B
IWA3357	0	15	5D	B	B	A	A	A	B	B	A	A	A	A	*	B	A	B	B	B	A	B	*	B	B	B	A	A	A	B	A	B	A	A	A	*	B	A	*	B	A	A	B	A	B	A	A	A	A
IWB4419	5.32	15	5D	B	B	A	A	A	B	B	A	A	A	A	*	B	A	B	B	B	A	B	A	*	B	B	A	A	A	B	A	B	A	A	A	B	B	A	B	B	A	A	A	A	B	A	*	A	A
IWB4139	5.78	15	5D	B	B	A	A	A	B	B	A	*	A	A	*	B	A	B	B	B	A	B	A	*	B	B	A	A	A	B	A	B	A	A	A	*	B	A	B	*	A	A	A	A	B	A	*	A	A
IWB45442	7.67	15	5D	B	B	*	A	A	B	B	A	A	A	A	B	B	A	B	B	B	A	B	A	*	B	B	A	A	*	B	A	B	*	A	A	B	B	A	B	B	A	A	A	A	B	A	B	A	A
IWB35889	15.01	15	5D	B	B	A	A	A	B	B	A	A	A	A	B	*	A	*	B	B	A	B	A	B	B	A	A	B	A	B	B	B	*	A	A	B	B	*	B	B	A	A	A	A	B	A	A	A	A
IWA5812	35.11	15	5D	A	B	A	*	A	B	B	A	*	A	A	B	B	A	B	A	B	A	A	*	B	B	A	A	*	A	B	B	B	A	A	*	B	B	A	A	B	B	A	A	A	B	A	B	A	A
IWB53180	41.72	15	5D	A	B	*	B	A	B	A	A	A	A	A	B	B	B	*	A	A	A	A	B	B	B	A	A	A	A	B	B	B	A	A	A	B	B	A	A	B	B	A	A	A	B	A	B	A	A
IWB107	46.37	15	5D	A	B	A	B	A	B	A	B	A	A	A	*	B	B	B	A	A	A	A	B	B	B	A	A	A	A	*	B	A	A	A	A	B	B	A	A	B	B	A	A	A	B	A	B	A	A
IWB44733	50.93	15	5D	A	B	A	B	A	B	A	B	A	A	A	B	B	B	B	A	A	A	A	B	B	A	A	A	A	A	*	A	A	A	A	A	B	A	A	A	B	A	A	A	A	B	A	B	A	A
IWB44302	54.9	15	5D	A	A	A	B	A	B	A	B	A	A	A	B	B	B	B	A	A	A	A	B	B	A	A	A	A	A	*	B	A	A	A	A	B	A	A	A	*	A	A	A	A	*	A	B	A	B
IWB51648	70.25	15	5D	A	A	A	A	A	B	A	B	A	A	A	B	A	A	B	A	A	A	A	B	B	A	B	A	A	A	B	B	B	A	A	A	B	A	A	A	*	A	A	A	B	*	A	B	A	B
IWB34532	73.13	15	5D	A	A	A	A	A	B	A	B	A	A	A	B	A	A	B	A	A	A	A	B	B	A	B	A	A	A	B	B	B	A	A	A	B	A	A	A	B	A	A	A	B	B	A	B	*	B
IWA2771	75.02	15	5D	A	A	A	B	A	B	A	B	A	A	A	B	A	A	B	A	A	A	A	B	B	A	B	A	A	A	B	B	B	A	A	A	B	A	A	A	B	A	A	A	B	B	B	B	*	B
IWB25501	77.88	15	5D	A	A	A	B	A	*	A	B	A	A	A	B	A	A	B	A	A	A	A	B	B	A	B	A	A	A	B	B	B	A	A	A	B	A	A	A	B	A	A	*	B	B	A	A	A	B
IWB7466	0	16	6A	A	B	A	B	A	B	A	B	A	A	B	A	B	A	A	*	B	*	B	A	B	A	B	B	A	B	B	*	B	B	B	B	A	B	A	A	A	A	B	A	B	B	A	B	B	*
IWB42041	7.14	16	6A	A	B	A	B	A	B	B	B	A	A	*	A	B	A	A	B	*	A	B	A	B	A	B	B	A	*	B	A	B	A	B	B	A	B	A	A	A	A	B	A	B	B	A	B	B	B
IWB74901	17.83	16	6A	*	B	B	B	A	B	B	B	A	B	B	A	B	A	A	B	B	A	B	A	B	A	B	A	A	B	A	A	A	A	B	B	A	B	A	A	A	A	A	A	A	B	A	B	B	B
IWB49115	21.22	16	6A	*	B	B	B	A	B	B	B	A	B	B	A	B	A	A	B	B	A	B	A	B	A	B	A	A	B	A	A	A	A	B	B	A	B	A	A	A	A	A	A	A	B	A	B	B	B
IWA7582	39.78	16	6A	B	A	B	A	B	B	B	*	A	B	*	B	B	A	A	B	B	A	B	A	A	A	B	B	A	B	A	B	A	A	B	B	A	B	B	A	A	A	B	B	A	A	A	A	B	B
IWA508	39.78	16	6A	B	A	B	A	B	B	B	B	A	B	A	B	B	A	A	B	B	A	B	A	A	A	B	B	A	B	A	B	A	A	B	B	A	B	B	A	A	A	B	B	A	A	A	A	B	B
IWA5704	49.61	16	6A	B	A	A	A	*	B	B	B	A	B	A	B	B	A	A	*	*	A	B	A	A	A	B	B	B	*	A	*	A	A	*	A	B	*	B	A	A	A	B	*	B	A	*	A	B	B
IWB1574	56.31	16	6A	B	A	A	A	B	B	B	B	A	A	A	B	B	A	A	B	B	A	B	A	A	A	B	B	A	B	A	B	A	A	B	A	A	B	B	A	A	A	B	B	A	A	B	A	B	B
IWA6484	59.35	16	6A	B	A	A	A	B	*	B	B	A	B	A	B	B	A	A	B	B	A	B	A	A	A	B	B	A	B	A	B	A	A	*	A	A	B	B	A	A	A	*	B	A	A	*	A	B	B
IWA3463	63.03	16	6A	B	A	A	*	B	B	B	B	A	B	A	B	B	A	A	B	B	A	B	*	*	*	B	B	A	B	*	B	A	A	*	A	A	B	B	A	A	A	B	*	A	A	B	A	B	B
IWB15078	69.31	16	6A	B	A	A	A	B	B	B	B	A	B	A	B	B	B	A	B	B	A	B	A	A	A	B	B	A	B	B	B	A	A	B	A	A	B	B	B	A	B	B	B	A	A	B	A	B	B
IWB54517	72.01	16	6A	B	A	A	A	B	B	B	B	A	B	A	B	B	B	A	B	B	A	B	A	A	A	B	B	A	B	B	B	A	A	B	A	A	B	B	B	A	B	B	A	A	A	B	A	B	B
IWB13056	0	17	6B	A	A	A	*	B	B	B	B	B	B	B	B	A	A	A	B	B	*	B	B	*	B	*	A	B	A	B	A	B	B	A	A	B	B	B	B	*	B	A	B	A	B	A	A	*	B
IWA4633	3.28	17	6B	A	A	A	A	B	B	B	B	B	B	B	B	A	A	A	B	B	A	B	B	A	B	B	A	B	A	B	A	B	*	A	A	B	B	B	B	A	B	A	B	A	A	A	A	A	B
IWA3229	22.81	17	6B	*	B	A	A	B	*	B	B	B	B	B	A	A	B	A	B	B	*	B	B	B	B	B	A	B	A	B	A	B	B	A	B	A	B	B	B	A	B	B	B	A	A	A	A	A	B
IWA1764	23.6	17	6B	A	*	A	A	B	A	*	*	*	*	*	A	A	B	A	*	*	A	B	B	B	B	B	A	*	A	B	A	*	*	A	B	A	B	A	*	A	B	B	B	A	A	A	A	A	B
IWA1764.2	23.6	17	6B	A	B	A	A	B	A	B	B	B	B	B	A	A	B	A	B	B	A	B	B	B	B	B	A	B	A	B	A	B	B	A	B	A	B	A	B	A	B	B	B	A	A	A	A	A	B
IWB14523	31.36	17	6B	A	B	A	B	A	A	B	A	*	B	B	A	*	B	B	B	B	A	B	B	B	B	*	B	B	A	B	*	B	B	A	B	A	B	A	A	A	A	B	*	A	A	A	A	B	B
IWB68945	37.05	17	6B	A	B	A	B	A	A	B	A	B	B	B	A	*	B	B	B	B	A	B	B	B	B	*	B	B	A	B	*	B	B	A	B	B	B	A	A	A	A	B	*	A	A	A	A	B	B
IWB12395	63.4	17	6B	A	*	A	B	B	B	B	A	B	A	B	A	A	B	B	B	B	A	B	B	B	B	A	B	B	A	B	A	B	B	A	B	B	B	A	A	*	B	B	A	A	A	*	B	B	A
IWA349	86.66	17	6B	A	A	A	B	B	A	B	A	B	A	B	B	A	B	A	B	A	B	B	B	B	B	A	B	B	B	B	A	B	B	B	B	B	A	A	A	B	B	B	A	A	B	B	B	B	B
IWA7116	104.83	17	6B	A	A	A	B	B	A	B	A	B	A	B	B	A	B	A	A	A	B	B	B	B	B	A	B	B	B	A	B	B	B	B	B	B	A	A	A	B	B	A	A	A	B	B	B	B	B
IWB2096	125.2	17	6B	B	A	A	A	B	A	B	A	B	A	B	B	A	A	B	A	A	B	A	B	B	A	A	A	A	B	A	B	*	B	B	B	A	A	A	A	A	B	A	A	A	B	B	A	B	A
IWA3224	129.83	17	6B	B	A	A	A	B	A	B	A	B	A	B	B	A	A	B	A	A	B	A	B	B	A	A	A	A	B	A	B	A	B	B	B	A	A	A	A	A	B	A	A	A	B	B	A	B	A
IWA4567	134.37	17	6B	A	A	A	A	B	A	B	A	B	A	B	B	B	A	B	A	A	B	A	B	B	A	A	A	A	B	A	B	A	B	B	B	A	A	A	A	A	B	A	B	A	A	B	A	B	A
IWB1483	0	18	7A	B	A	B	A	A	B	A	A	A	B	A	B	A	*	A	B	B	B	A	A	B	B	A	B	B	A	B	A	A	A	B	B	B	A	A	A	B	A	B	B	B	B	A	A	A	B
IWB11165	1.27	18	7A	B	A	B	*	A	B	A	A	A	B	A	B	A	A	A	B	B	B	A	A	B	B	A	B	B	A	B	A	A	A	B	B	B	A	A	A	B	A	B	*	B	B	B	A	A	*
IWB7063	1.27	18	7A	B	A	B	A	A	B	A	A	A	B	*	B	A	A	A	B	B	B	A	A	B	B	A	B	B	A	*	A	A	A	B	B	*	A	A	A	B	*	B	B	B	B	B	A	A	B
IWA1880	1.98	18	7A	B	A	B	A	A	B	A	A	A	B	A	*	A	A	A	B	B	*	A	A	B	B	A	*	*	A	*	A	A	A	B	B	*	A	A	A	B	A	B	B	*	B	B	A	A	B
IWB8513	16.76	18	7A	B	A	B	B	A	B	A	A	A	B	A	*	B	A	A	B	B	*	A	A	A	B	A	B	*	A	B	A	A	A	B	B	*	A	A	A	B	A	B	A	*	B	B	A	B	B
IWB21914	36.74	18	7A	B	A	B	B	A	B	A	A	A	B	A	A	B	A	A	B	B	B	B	B	A	B	A	B	B	A	B	A	A	B	B	A	A	A	B	B	B	A	B	A	A	B	A	A	B	B
IWB6718	37.36	18	7A	B	A	B	B	A	B	A	A	A	B	B	A	B	A	A	B	B	B	B	B	A	B	A	B	B	A	B	A	A	B	B	A	*	A	B	B	B	A	B	A	A	B	A	A	B	B
IWA473	37.36	18	7A	B	A	B	B	A	B	A	A	A	B	B	A	B	A	A	B	B	B	B	B	A	*	A	B	*	A	B	A	A	B	B	A	A	A	B	B	B	A	B	A	A	B	A	A	B	B
IWA7192	42.68	18	7A	B	A	B	B	A	B	A	A	A	B	B	A	B	B	A	B	B	*	B	B	*	B	B	B	B	A	B	A	A	B	B	A	A	A	B	B	B	B	B	A	A	B	A	A	B	B
IWB10719	44.11	18	7A	B	A	*	B	A	B	A	A	A	B	B	A	B	B	A	B	B	B	B	B	A	B	B	B	B	A	B	A	A	B	B	A	A	A	B	B	*	B	B	A	A	B	A	A	B	B
IWB8181	59.15	18	7A	B	A	A	B	A	A	A	A	A	*	A	A	B	B	A	B	B	B	B	A	A	A	B	A	B	A	B	A	A	B	A	B	A	B	B	B	B	B	A	A	A	B	*	A	B	A
IWA2820	59.82	18	7A	B	A	A	B	A	A	A	A	A	A	A	A	B	B	A	B	B	B	B	A	A	A	B	A	B	A	B	A	A	B	A	B	A	B	B	B	B	B	A	A	A	B	A	A	B	A
IWA1802	70.03	18	7A	B	A	A	A	A	*	A	A	A	A	A	A	B	B	B	B	B	*	B	A	A	A	B	A	B	A	B	A	A	B	B	B	A	B	B	B	B	B	*	A	A	B	A	A	B	B
IWA7430	70.03	18	7A	B	A	A	*	*	A	A	A	*	A	*	*	B	*	B	*	B	*	B	A	*	*	B	A	B	A	B	A	A	B	B	*	A	B	B	B	B	B	A	A	A	*	A	A	B	B
IWB13779	71.14	18	7A	B	A	A	A	A	A	A	A	A	A	A	A	B	B	B	A	B	A	B	A	A	A	B	A	B	A	B	A	A	B	B	B	A	B	B	*	B	B	A	A	A	*	A	A	B	B
IWA6562	82.02	18	7A	B	A	A	A	A	A	A	A	A	A	A	A	B	B	B	A	A	A	B	A	A	B	A	A	B	A	B	A	A	B	B	B	A	B	A	A	B	B	A	A	A	B	A	A	B	B
IWB9816	97.55	18	7A	A	A	A	A	B	A	B	A	A	A	A	A	B	B	B	A	A	A	A	A	A	B	A	A	B	A	B	A	A	B	B	B	A	B	A	A	A	B	A	A	A	B	A	B	B	B
IWB34095	114.88	18	7A	A	A	B	A	B	A	B	A	A	A	B	A	A	B	A	A	A	B	A	A	A	A	A	A	B	A	B	A	A	A	B	B	A	B	A	A	A	A	A	A	A	B	A	B	B	B
IWA7884	116.08	18	7A	A	A	B	A	B	A	B	A	A	A	B	A	A	B	A	A	A	B	A	A	A	A	A	A	B	A	B	A	A	A	B	B	A	B	A	A	A	A	A	A	A	B	A	B	B	B
IWB12038	120.38	18	7A	A	A	B	A	B	A	B	A	A	A	B	A	A	A	A	A	A	B	A	A	A	A	A	A	B	A	B	A	A	A	B	B	A	B	A	A	A	A	A	A	A	B	A	B	B	B
IWB34754	139.72	18	7A	A	A	B	A	*	B	B	A	A	A	A	A	A	A	A	B	A	B	A	A	A	*	A	B	B	B	B	A	A	A	B	B	A	B	*	A	A	A	A	B	A	B	A	A	B	A
IWA5799	151.49	18	7A	A	A	B	A	*	B	B	A	A	*	A	A	A	A	B	B	A	B	A	A	*	*	A	B	A	B	B	A	A	A	B	A	B	A	*	A	A	A	A	B	A	B	A	A	B	A
IWA3970	0	19	7D	B	B	B	B	B	A	A	B	A	A	B	B	B	A	A	A	B	*	B	B	B	B	A	B	B	A	B	B	A	A	B	B	B	B	*	A	B	A	A	B	A	A	A	B	A	B
IWB7610	2.43	19	7D	B	B	B	B	B	A	A	B	A	A	B	B	B	A	A	A	B	B	B	B	B	B	A	B	B	A	B	B	A	A	B	B	B	B	B	A	B	A	A	B	A	A	A	B	A	B
IWA2523	2.43	19	7D	*	B	B	B	B	A	A	B	A	A	B	B	B	A	A	A	B	B	B	B	B	B	A	B	B	A	B	B	A	A	B	B	B	B	B	A	B	A	A	B	A	A	A	B	A	B
IWA2523.2	2.43	19	7D	A	B	B	B	B	A	A	B	A	A	B	B	B	A	A	A	B	B	B	B	B	B	A	B	B	A	B	B	A	A	B	B	B	B	B	A	B	A	A	B	A	A	A	B	A	B
IWA2522.2	3.55	19	7D	A	B	B	B	B	A	A	B	A	A	B	B	B	A	A	A	B	B	B	B	B	B	A	B	B	A	B	B	A	A	B	B	B	B	B	A	B	A	A	B	A	A	A	B	A	B
IWA2522	3.55	19	7D	*	B	B	B	B	A	A	B	A	A	B	B	B	A	A	A	B	B	B	B	*	B	A	B	B	A	B	B	A	A	*	B	B	B	B	A	B	A	A	B	A	A	A	B	A	B
IWA2523.H	3.55	19	7D	B	B	B	B	B	A	A	B	A	A	B	B	B	A	A	A	B	B	B	B	B	B	A	B	B	A	B	B	A	A	B	B	B	B	B	A	B	A	A	B	A	A	A	B	A	B
IWA2522.H	4.11	19	7D	B	B	B	B	B	A	A	B	A	A	B	B	B	A	A	A	B	B	B	B	B	B	A	B	B	*	B	B	A	A	B	B	B	B	B	A	B	A	A	B	A	A	A	B	A	B
IWB27602	12.32	19	7D	B	B	B	A	B	A	A	B	A	A	B	B	B	A	A	A	B	B	B	B	B	B	A	B	B	B	*	B	A	A	B	B	B	B	B	A	B	A	A	B	A	A	A	B	A	B
IWB34836	17.05	19	7D	B	B	B	A	B	A	A	B	A	A	B	B	B	A	A	A	B	B	B	B	B	B	A	B	B	B	*	*	A	A	A	B	B	B	B	A	B	A	A	B	A	A	A	B	A	B
[truncated: 132 more columns]
