# Supplementary material for: Mapping Quantitative Trait Loci for High-Temperature Adult-Plant Resistance to Stripe Rust in Spring Wheat PI 197734 Using a Doubled Haploid Population and Genotyping by Multiplexed Sequencing
Source: Front Plant Sci. 2020 Nov 12;11:596962. doi: 10.3389/fpls.2020.596962 (PMC7688900; doi:10.3389/fpls.2020.596962)
Supplement: Supplementary file 7 [file Table_5.XLSX]

## Sheet: Sheet1
Data File 2 Phenotype data of 178 AvS*PI 197734 DH lines
Line	PU17-ITa	PU17-DS	MV17-IT	MV17-DS	PU18-IT	PU18-DS	MV18-IT	MV18-DS	PSTv-37	Awn
AvS	8	95	8	100	8	100	8	100	8	1
PI 197734	1.3	1.3	2.3	6.7	1.7	1.7	2.7	5.7	6	0
DH-1	5.67	7.33	8	23.33	7.33	80	6.33	26.67	8	1
DH-2	3.33	5.33	8	86.67	7.33	83.33	7	73.33	8	1
DH-3	6	43.33	8	96.67	5.67	76.67	7.33	76.67	8	0
DH-4	2.67	3	3	25	3	20	2.67	6.67	8	0
DH-5	7.33	56.67	7.67	90	7	96.67	7.67	83.33	8	1
DH-6	2.33	1.67	4.33	46.67	3.33	23.33	3.33	15	8	0
DH-7	2.33	2	4.33	13.33	3	13.33	3.33	6.67	8	0
DH-9	7	56.67	8	100	8	100	8	100	8	1
DH-10	0.67	0.33	2	10	1	1	2	8.33	8	1
DH-11	5.33	16.67	7	80	5.67	66.67	6.33	33.33	8	1
DH-12	2.67	3	5	40	3.33	26.67	2.67	7.33	8	0
DH-14	8	83.33	8	86.67	8	93.33	7.67	53.33	8	0
DH-15	5.33	23.33	8	93.33	4.33	53.33	7.67	70	8	0
DH-16	6	10	7.67	76.67	7	60	3.67	11.67	8	0
DH-17	6.67	73.33	7.33	96.67	5.67	76.67	8	86.67	8	1
DH-18	1.33	1.33	5	30	2.67	6.67	2.33	5.67	8	1
DH-19	3.33	3	5	46.67	3	20	3	8.33	7	0
DH-20	3.67	8.33	5.33	70	3.33	33.33	4.33	33.33	8	0
DH-22	7	30	8	96.67	7	91.67	8	93.33	8	0
DH-23	5.33	16.67	7	50	4.67	50	4.67	26.67	8	0
DH-24	0	0	1.67	1.67	0.33	0.33	2	2	7	0
DH-25	4.33	33.33	7	86.67	5	60	7	80	8	0
DH-26	5.67	70	5.33	63.33	5.67	53.33	7	70	8	0
DH-27	3.33	2.67	4	40	4.33	33.33	3.33	16.67	8	1
DH-28	4.33	30	2.67	16.67	3.33	26.67	4.67	50	8	1
DH-29	5.67	40	7	83.33	6	73.33	6.67	63.33	8	0
DH-30	4	26.67	7	73.33	4	43.33	7	53.33	8	0
DH-31	5.33	36.67	6.33	66.67	3.67	46.67	5.67	30	8	1
DH-32	6.33	63.33	7.67	76.67	5.33	60	5.67	43.33	8	0
DH-34	5.67	21.67	7.67	96.67	6	83.33	7	53.33	8	0
DH-35	5.33	16.67	7.33	93.33	7	98.33	7.67	86.67	8	1
DH-36	2	0.67	2.67	5.67	0.33	0.33	2.67	4	8	1
DH-37	5.33	20	8	73.33	6	60	6	30	8	0
DH-38	2	3.67	3	20	.	.	7	73.33	7	0
DH-39	3	2.67	4.33	33.33	2.67	11.67	3	10	7	0
DH-40	0.33	0.33	2.33	33.33	2.33	17	2.67	13.33	8	1
DH-41	4.33	43.33	5	66.67	5	75	6.67	80	8	1
DH-42	4.33	43.33	4.67	70	3.67	36.67	4.67	50	8	0
DH-43	0.33	0.33	2.33	7.33	2.67	16.67	3	13.33	8	0
DH-44	7	66.67	8	93.33	7	80	6.67	56.67	8	1
DH-45	6.67	70	6.67	80	5.67	70	6.67	50	8	0
DH-46	7	53.33	8	83.33	7.33	83.33	6.67	40	8	1
DH-47	6	70	7.67	93.33	6.33	85	7.33	76.67	8	0
DH-48	2.67	2	4.33	43.33	3.33	20	2.33	4	8	0
DH-49	4.33	6.67	6	60	3.67	46.67	6	30	8	1
DH-50	2	1.33	3.33	20	2.67	11.67	2	6.67	6	1
DH-51	5	11.67	6.67	80	6.33	66.67	6.67	53.33	8	1
DH-52	3.33	23.33	3.33	33.33	4	36.67	5.33	43.33	8	1
DH-54	3	3	6.33	30	6	46.67	5	18.33	8	0
DH-57	7	70	8	96.67	7.67	91.67	7.33	86.67	8	0
DH-58	8	88.33	8	100	8	95	8	73.33	8	1
DH-59	4	20	6.33	86.67	4.67	63.33	6.67	83.33	8	1
DH-60	7.67	60	8	96.67	7.33	80	7.67	63.33	8	1
DH-61	3.67	16.67	7.67	93.33	6.33	86.67	7	70	8	0
DH-62	5	33.33	7.33	90	6.67	88.33	6.67	66.67	8	1
DH-63	6.67	50	8	93.33	7.33	81.67	8	63.33	8	0
DH-64	0	0	2.67	20	2.67	26.67	2	6.67	8	0
DH-65	0.67	0.67	3	26.67	3	30	3.33	26.67	6	0
DH-66	3	16.67	2.33	13.33	3.33	36.67	3.33	30	8	0
DH-67	7.33	85	8	100	8	100	8	93.33	8	1
DH-68	3.67	3	3	16.67	2.33	10	2.33	4	8	0
DH-69	6.33	63.33	8	96.67	6.67	91.67	7.33	80	8	1
DH-70	0.33	0.33	2.67	8.33	2.33	8.33	3	8.33	8	1
DH-71	7.67	88.33	8	100	7.67	98.33	8	96.67	8	0
DH-72	4	11.67	3.33	46.67	3	16.67	3.33	6.67	8	1
DH-73	2.67	4.67	2	10	1.33	4	2	2	7	1
DH-74	7.67	73.33	7.33	93.33	8	100	8	96.67	8	1
DH-75	5.67	40	7.33	80	5.67	53.33	7.67	53.33	8	0
DH-76	5.67	40	7.67	96.67	5.67	66.67	7.33	70	8	1
DH-77	6.67	26.67	8	70	7.67	88.33	7.33	33.33	8	0
DH-80	4.67	13.33	8	76.67	6.67	80	7.33	56.67	8	0
DH-81	5.67	23.33	7	80	4.33	53.33	6.67	43.33	8	1
DH-82	5	23.33	8	86.67	4.67	50	6.67	36.67	8	0
DH-83	4	16.67	4.67	43.33	3	16.67	3	10	8	1
DH-84	3.33	13.33	7.67	83.33	6.33	83.33	6.67	70	8	0
DH-85	8	70	8	96.67	7.67	91.67	8	70	8	1
DH-86	2.33	1.67	5	70	3.67	40	4.33	40	8	0
DH-87	5	13.33	7	80	4.33	40	6.33	43.33	8	1
DH-88	1	0.67	2.67	23.33	2	5.33	2	4	8	1
DH-89	4.33	5	7.67	73.33	3.67	26.67	5	20	8	0
DH-90	4	6.67	7.67	26.67	5	30	5.67	23.33	8	1
DH-91	6	56.67	6.67	93.33	6.33	80	7	80	8	1
DH-92	6	36.67	4	46.67	2.67	20	4.33	26.67	8	1
DH-93	1.33	1.33	3.67	30	2.67	8.33	2.67	5.67	8	1
DH-94	0.33	0.33	3	36.67	2.33	11.67	2	3	8	0
DH-95	7.33	43.33	7.67	46.67	6.67	60	6.67	40	8	1
DH-96	2	1.67	3.33	30	2.67	18.33	2.33	5	8	1
DH-98	4.33	16.67	7.33	73.33	6.33	56.67	7	46.67	8	1
DH-99	3.33	15	6.33	40	3.33	30	5	30	8	1
DH-100	3.33	5.67	4.33	50	5.67	53.33	6.67	50	8	0
DH-101	2	1.67	7.67	26.67	6	46.67	4	18.33	8	0
DH-102	6.67	60	6.67	66.67	4.67	46.67	6.33	46.67	8	1
DH-103	7.33	76.67	7.33	86.67	7.33	93.33	8	90	6	0
DH-104	6.33	20	8	70	6	53.33	7	33.33	8	1
DH-105	3.33	6.67	4.67	53.33	4.33	46.67	6.33	36.67	8	0
DH-106	2.33	1.67	3	15	2.67	8.33	2.67	6.67	8	0
DH-107	7.33	76.67	7.33	93.33	7.33	95	8	90	6	0
DH-108	3.33	4	3.33	43.33	3	30	3.33	6.67	8	1
DH-109	4	16.67	7	70	4	43.33	5	40	8	1
DH-110	4.67	33.33	7.67	90	4	56.67	7	60	8	1
DH-111	6	33.33	8	66.67	6.33	60	7	46.67	8	1
DH-112	5.33	33.33	7.67	96.67	5.67	66.67	7	73.33	8	1
DH-114	7.33	63.33	8	86.67	7	81.67	7.67	73.33	6	0
DH-115	3	3	6.33	53.33	3.67	23.33	4.67	20	8	1
DH-116	3	3	5	43.33	3	30	3	20	8	0
DH-117	3.33	3	5	46.67	3.33	23.33	4.33	26.67	8	0
DH-118	6.33	23.33	7.67	56.67	4.33	43.33	6	33.33	8	1
DH-119	2	1.33	2.67	11.67	2.67	16.67	2	3	8	0
DH-120	6.67	46.67	8	93.33	4.67	60	7.67	66.67	6	0
DH-123	3.67	6.67	6	46.67	3	20	5.33	40	8	0
DH-124	7	70	8	90	4.67	60	7.33	86.67	8	1
DH-125	3.67	6.67	6	35	3.33	26.67	5.33	33.33	8	0
DH-126	0	0	2.33	10	1.33	2.33	2	5.67	8	1
DH-128	7	30	8	93.33	7	80	7	46.67	8	0
DH-130	5.67	13.33	8	90	5.67	60	6.67	30	8	1
DH-131	2	1.67	4	56.67	3.67	40	3.33	26.67	8	0
DH-132	4	11.67	3.67	40	6.67	81.67	6.67	70	8	1
DH-133	7.33	50	7	66.67	4	23.33	4.67	30	8	0
DH-134	3.67	6.67	6.67	50	3.67	26.67	5.33	26.67	8	0
DH-135	3.33	11.67	6	40	4	40	3	10	8	0
DH-136	2.67	5.67	3	26.67	3.33	40	3.33	26.67	6	1
DH-137	4	8.33	6.33	80	4	30	7	50	8	0
DH-139	3.33	4	4.33	60	3.67	30	5.67	30	8	1
DH-140	4.67	20	3.67	56.67	3.67	53.33	5.67	63.33	8	0
DH-141	2.67	4	6.33	63.33	3.33	33.33	4.67	30	8	0
DH-143	3.67	6.67	7.33	76.67	4.33	43.33	4.67	25	8	0
DH-144	2	2	3.33	26.67	2.33	10.67	3	6.67	8	0
DH-145	0.33	0.33	2.33	23.33	2.33	20	2.33	6.67	8	1
DH-146	3.33	6.67	4.33	63.33	3	33.33	4.33	23.33	8	0
DH-147	8	90	7.67	96.67	7.67	96.67	8	86.67	8	1
DH-148	3	5.67	3	20	3	30	2.33	10	8	1
DH-149	7	53.33	6.33	86.67	5.33	73.33	7.33	86.67	6	0
DH-150	2.67	3	2.67	16.67	3	30	4	33.33	8	1
DH-151	3	5	4	53.33	5.33	56.67	4.67	36.67	8	1
DH-152	2.33	2.67	3	23.33	3.33	26.67	3	11.67	8	1
DH-153	3	5.67	2.33	10	3	26.67	4	36.67	8	0
DH-154	1.67	1.33	1.33	2.33	1	1	2	4	8	0
DH-155	3.33	6.67	7.33	83.33	6.33	78.33	4.33	16.67	8	0
DH-156	3.33	8.33	7.67	96.67	3.67	43.33	6.33	76.67	8	0
DH-157	0.33	0.33	2	3	1	2	3	11.33	8	1
DH-158	3	4	4.33	46.67	2.67	15	3.33	11.67	8	1
DH-159	6	46.67	7.33	90	6.67	83.33	7	73.33	8	0
DH-160	5.67	46.67	7	96.67	5.33	83.33	7	86.67	7	0
DH-161	7	26.67	7	30	5	46.67	5	26.67	8	0
DH-162	3.67	4.67	5.33	21.67	3	16.67	3.67	10	7	1
DH-163	4.67	6.67	7.33	53.33	2.67	11.67	4.33	21.67	8	1
DH-164	2	2	3.33	23.33	3	8.33	2.33	4	8	1
DH-165	0.33	0.33	4.67	43.33	3	16.67	2.33	6.67	8	1
DH-166	7	73.33	5.67	70	3.67	46.67	3.67	23.33	8	0
DH-167	6	30	8	86.67	7	96.67	7	43.33	8	1
DH-168	6	26.67	6.33	86.67	5	73.33	6.67	73.33	8	0
DH-169	2.67	5	2.33	23.33	3	16.67	2	8.33	7	1
DH-170	7	36.67	8	73.33	5.33	46.67	4.67	26.67	8	0
DH-171	7	56.67	8	76.67	5.33	60	6.67	36.67	8	1
DH-172	3.67	16.67	3	26.67	4	43.33	6	73.33	8	0
DH-174	3	3	3.67	56.67	2.67	16.67	3	15	8	1
DH-175	6.33	8.33	7.33	73.33	6.33	60	6	23.33	8	1
DH-176	8	88.33	8	100	8	98.33	8	80	8	0
DH-177	3.67	8.33	5.33	56.67	3	30	4	20	8	0
DH-178	5.33	16.67	5	53.33	3.67	23.33	4.67	30	8	1
DH-179	5.67	50	7.33	80	7	90	7	73.33	8	0
DH-180	6.67	63.33	8	83.33	5.67	73.33	6.67	66.67	8	1
DH-181	3	2	7	86.67	5.33	63.33	6	60	8	0
DH-182	6.33	46.67	8	96.67	7	90	7.67	80	8	1
DH-183	6	18.33	7.33	60	3.33	23.33	5.33	40	8	0
DH-184	7.67	50	6	76.67	4.67	53.33	5.67	43.33	8	0
DH-186	5.67	46.67	7.67	90	5	70	5.33	53.33	8	1
DH-187	4.67	28.33	4	60	4.67	56.67	6	60	8	1
DH-189	4	4	4	23.33	2	4	3	10	8	0
DH-190	7.67	66.67	8	86.67	7.33	85	7.67	66.67	8	0
DH-191	4.33	11.67	6.33	70	3.33	33.33	4.33	23.33	8	0
DH-192	3	4	5.67	70	4	43.33	5.67	40	8	1
DH-193	3.67	5	6.33	76.67	3	40	3.33	11.67	8	0
DH-195	5	11.67	5.67	50	4.67	43.33	6	33.33	8	0
DH-196	7.33	76.67	7.33	96.67	6.67	95	7	80	8	1
DH-197	5.33	6.67	7.67	43.33	3.33	16.67	6.33	50	8	0
DH-198	3	16.67	5.33	86.67	4.67	66.67	6	60	8	1
DH-199	4.33	5	5	33.33	3	13.33	4	16.67	8	0
a PU17	Pullman 2017
MV17	Mount Vernon 2017
PU18	Pullman 2018
MV18	Mount Vernon 2018
b Awn	1' represents awned characteristic; '0' represents awnletted characteristic
